## **Experimental Urolithiasis Model to assess Phyto-fractions as Anti-lithiatic Contributors: A Herbaceutical Approach**

**Aishwarya Tripurasundari Devi<sup>1</sup>, Yashaswini N<sup>1</sup>, Farhan Zameer<sup>2¶\*</sup>, Nagendra Prasad MN<sup>1¶\*</sup>**

*<sup>1</sup>Department of Biotechnology, JSS Science and Technology University, JSS Research Foundation, SJCE Campus, Manasagangotri, Mysore - 560 006, Karnataka, India.*

*<sup>2</sup>PathoGutOmic Laboratory, Department of Biochemistry, School of Basic and Applied Sciences, Dayananda Sagar University, Shavige Malleshwara Hills, Kumaraswamy Layout, Bengaluru - 560 111, Karnataka, India.*

¶ Both the authors share the corresponding authorship for equal contribution.

**\*Corresponding author 1: Dr. Nagendra Prasad MN:** Professor & Head, Department of Biotechnology, JSS Science and Technology University, JSS Research Foundation, SJCE Campus, Manasagangotri, Mysore - 560 006, Karnataka, India.

Phone no: 0091-9886480528

Email: [mnnagendraprasad@sjce.ac.in](mailto:mnnagendraprasad@sjce.ac.in)

**\*Corresponding author 2: Dr. Farhan Zameer:** Assistant Professor in Biochemistry, PathoGutOmic Laboratory, School of Basic and Applied Sciences, Department of Biological Sciences, Dayananda Sagar University, Shavige Malleshwara Hills, Kumaraswamy Layout, Bengaluru - 560 111, Karnataka, India.

Phone no: 0091-9844576378

Email: [farhanzameeruom@gmail.com](mailto:farhanzameeruom@gmail.com)

## Abstract

Life-style disorders have brought a serious burden on the maintenance of health in animals and humans. Lithiasis specifically nephro- and urolithiasis is no exception and needs urgent attention. Currently, only semi-invasive and surgical methods are widely employed which leads to trauma and reoccurrence of kidney stones. Hence complementary and alternative herbal medicine could pave newer ways in exploring anti-lithiatic contributors. The current study attempts to screen twenty herbal hot aqueous leaf extracts for assessing their antioxidant potency (anti-stress) and efficiency against urolithiasis in an experimental calcium oxalate-induced *in vitro* (chicken egg membrane) model. The study was further validated by *In silico* molecular docking studies using the Molegro software package on enzymatic biomarkers involved in scavenging oxidants in the host and regulating oxalate metabolism at a cellular level. Among the screened botanicals *Kalanchoe pinnata* exhibited promising results compared to the standard chemical (potassium-magnesium citrate) and phyto-formulation drug (cystone) currently used by clinicians for treating urolithiasis. The phytochemical profiling (qualitative and quantitative) and virtual studies indicated rutin from *Kalanchoe pinnata* as a potential candidate for preventing kidney stones. The results of the current study provide better insights into the design and development of newer, smart, and cost-effective herbal therapeutics making food as medicine.

**Keywords:** Lithiasis, Kidney stones, Calcium oxalate, Biomarkers, Anti-stress, Structure-activity relationship (SAR) Studies, Botanicals, *Kalanchoe pinnata*, Phyto-pharmaceutics

## Introduction

Food and health are the two integral components of human wellbeing. However, in the urge of adapting to newer technologies and advanced niches both these components are highly neglected. In consequence, many lifestyle, non-communicative disorders, or diseases has become a part of human health. Indian folklore medicine and Ayurveda proposes the implications of “food as medicine” from time immemorial. Further, complementary and alternative medicine (CAM) has been successful in exploring the scientific proof and mechanism of actions of these phyto-formulations leading to the development of newer drug targets and therapeutics. Phyto-cocktails are effective in many complications from venom antidots (Janardhan et al., 2019; Vineetha et al., 2020, Bhavya et al., 2021), neurodegenerative disorders (Kunnel et al., 2019; Satapathy et al., 2020), diabetes (Putta et al., 2016), ulcers (Prasad et al., 2019), cancer (Rakesh et al., 2015), infection (Zameer et al., 2016) to inflammation (Rakesh et al., 2016). With all the set examples from our previous studies, one major disorder caught our attention which was a common lifestyle disorder yet very painful, which had no structured therapy and was found in folks of all ages but most prevalent in men known as lithiasis (stone formation).

Lithiasis is a condition in which the formation of stones or calculi is observed due to the concentration of mineral salts (Grases et al., 2007). The kidney, urinary tract, pancreas, and gallbladder are the most commonly affected organs by lithiasis, and they are categorized based on their site of formation leading to nephrolithiasis, urolithiasis, pancreatolithiasis, and cholecystolithiasis respectively (Tatapudi et al., 2020). Stones containing calcium are a common type of calculi with a prevalence of 70-80%, of which calcium phosphate and calcium oxalate dominate (Han et al., 2015). Supersaturation of urine in presence of calcium and oxalate facilitates calcium oxalate stone development (Paliouras et al., 2012). Following are the factors which affect the formation of calcium oxalate stones; acidic urine, low volume of urine, hypercalciuria (increased concentration of calcium in urine leads to precipitation of calcium salts), hyperoxaluria (high concentration of oxalate excreted in urine), hypocitraturia (excretion of a lower amount of citrate in urine which leads to high pH) and hyperuricosuria (acidic urine dissolves uric acid, leading to stone formation). Apart from calcium, magnesium phosphate, uric acid, cysteine, silica, xanthine, and 2, 8-dihydroxyadenine also account for the stone formation (Moe et al., 2006; Evan et al., 2015). Further, with all the above understanding of biochemistry and pathophysiology of urolithiasis, an optimized and

standardized model system is a prime necessity that should be rapid, reliable, and reproducible. To serve this purpose, the chicken egg membrane model was employed to study the dissolution of calcium oxalate with nucleation and aggregation assessments (Phatak and Hendre, 2015). Indian traditional system of medicine (Ayurveda) strongly emphasizes the use of phyto-formulations for almost any ailments and urolithiasis, is no exception. Hence an attempt was made to explore the less exploited plants as anti-urolithiatic agents (table 1).

Further, phyto-bioactives in different forms crude, partially purified, purified, or in cocktails play a vital role either as a single drug or complex provide synergy in ameliorating health complications from a simple infection, inflammation to a cascade of disorders/diseases (Aishwarya et al., 2020). These various activities are mainly due to the different classes of phytochemicals predominately secondary metabolites of polyphenolic umbrella namely phenolics, flavonoids, alkaloids, terpenoids, tannins, saponins, and sterols (Pankaj et al., 2020; Khan et al., 2020). According to Gulcin (2020), a detailed correlation of phytochemicals with antioxidant efficacy is well illustrated and this property could be explored for stress and inflammation which is usually encountered during urolithiasis. Apart from the antioxidant phyto-bioactives, enzymatic biomarkers such as catalase (CAT), superoxide dismutase (SOD), peroxidase (PER), glutathione S-transferase (GST), contribute against redox reaction, stress, and inflammation respectively (Gopal et al., 2009). Besides, metabolic enzymes such as alanine-glyoxylate aminotransferase, oxalyl-coA decarboxylase, D-glycerate dehydrogenase, and lactate dehydrogenase (LDH) regulate a crucial role in stone formation (Ramu et al., 2017). Elucidation of the mechanism of action of these biomarkers in urolithiasis is very much essential. Structure-activity relationship (SAR) studies were employed to decipher the above set objective using molecular docking studies (Madhusudhan et al., 2016).

Henceforth, in the current study, an attempt has been employed to profile phytochemicals (qualitative), to evaluate the antioxidant potency, and to adapt a simple experimental model for kidney stones (chicken egg membrane) to screen anti-urolithiatic effect (*in vitro*) of selected 20 plants (aqueous extracts) supported by the *in silico* evaluation for proof-of-concept in search of highly-efficient and cost-effective herbaceuticals to ameliorate urolithiasis.

## **Materials & Methods**

All chemicals, solvents, and reagents used for the study were of analytical grade and were purchased from Himedia Pvt. Ltd, Mumbai, India. The standard drug Cystone<sup>®</sup> was purchased from Himalaya Drug Company, Bangalore, India. Unfertilized chicken eggs were procured from local poultry in Mysuru and membranes were isolated.

**Plant material:** Twenty different medicinal plant leaves (table 1) were collected from in and around Mysuru, India, from March to July 2018. Further, the plants were authenticated and are deposited at the herbarium center, Department of Studies in Botany, University of Mysore, Karnataka. The leaves of *Aegle marmelos*, *Apium graveolens*, *Artocarpus heterophyllus*, *Azadirachta indica*, *Citrus limon*, *Citrus sinensis*, *Coriandrum sativum*, *Cucumis sativus*, *Kalanchoe pinnata*, *Lawsonia inermis*, *Mangifera indica*, *Manilkara zapota*, *Momordica charantia*, *Moringa oleifera*, *Musa paradisiaca*, *Phyllanthus emblica*, *Plectranthus amboinicus*, *Psidium guajava*, *Punica granatum* and *Ribes Uva-crispa* were harvested, leaves were surface sterilized and dried in a hot air oven at 45°C for 48 hours and powdered to 60 mesh packed in an air-tight container until further experimentation.

**For extraction:** The hot aqueous extract was prepared for all the twenty plants, 20g of finely powdered leaves of the individual plant were mixed with 100 mL of distilled water (pH 5.8) and kept over a magnetic stirrer for 3 hours with a constant heat around  $50 \pm 2^\circ\text{C}$  (Meghashri et al., 2011). Only aqueous extracts were targeted in the study, intending to isolate polar/hydrophilic phyto-molecules which will be much more practical to suggest patients with urological complications as a homemade decoction. Muslin cloth was used to filter; later, the filtrate was subjected to centrifugation for 10 min at 8000 rpm, after which the supernatant was collected and stored in a freezer for further use.

### **Phytochemical analysis**

All the qualitative phytochemical profiling was performed according to the AOAC method (Shameh et al., 2018) and is represented in supplementary table 1.

### **Estimation of total phenol content (TPC)**

All aqueous plant extracts were assessed by Folin-Ciocalteu (FC) method with a slight modification (Meghashri et al., 2010). Briefly, various volumes of the extracts were made up to 3 mL with distilled water. Folin-Ciocalteu reagent of (1:1 diluted) 0.5 mL was added and incubated for 5 min at room temperature, 1.5 mL of sodium carbonate (20%) was

added followed by incubation in a boiling water bath for 5 min. The absorbance was measured at 640 nm. Gallic acid (1mg/mL) equivalents were used as the standard to estimate the phenolic content.

### **Assessment of *In vitro* antioxidant activities for aqueous phyto-fractions:**

#### **DPPH free radical scavenging assay**

The free radical scavenging activity of all the plant extracts was measured by the DPPH (1,1-diphenyl-2-picrylhydrazyl) method (Meghashri et al., 2010). Varied concentrations of the extracts [5 µg/mL, 10 µg/mL, 15 µg/mL, 20 µg/mL, and 25 µg/mL of gallic acid equivalent] followed by 1 mL of DPPH solution, shaken and was incubated at room temperature for 20 min in the dark after which absorbance was measured at 517nm. Gallic acid was used as standard. The activity of the radical scavenging was calculated by the following equation:

$$\text{Radical scavenging activity (\%)} = [(A_{\text{control}} - A_{\text{sample}}) / A_{\text{control}}] \times 100 \text{ (Where A = absorbance)}$$

#### **Metal ion chelating assay**

The complex ferrous iron - ferrozine can chelate Fe<sup>2+</sup>, which can be observed at 562 nm (Meghashri et al., 2010). Different concentrations of all extracts were taken, 50 µL of FeCl<sub>2</sub> and 200 µL of ferrozine were mixed and incubated at room temperature in the dark for 10 min; finally, absorbance at 562 nm against blank was measured. The same equation used in DPPH scavenging activity is used here to know the capacity of the extract in chelating ferrous ions with EDTA considered as standard.

#### **Reducing power assay**

Reduction of iron (III) by the extracts was measured with slight modification (Nedamani et al., 2015) by adding the various concentration of all extracts and made up the volume to 500 µL with phosphate buffer (20 mM) and then 500 µL of sodium ferricyanide (1%) was added and incubated at 50°C for 20 min. 500 µL of trichloroacetic acid (10%) was added to the solution to terminate the reaction followed by 10 min centrifugation. Finally, 1.5 mL of distilled water along with 300 µL of ferric chloride (0.1%) was added to the supernatant, and absorbance at 700nm was measured using gallic acid as standard.

## **Anti-lithiatic activity**

The anti-lithiatic activity was assessed for all the extracts according to Phatak and Hendre, (2015). Calcium chloride (25 mM) 1mL of the solution was mixed with 2 mL of tris buffer (pH 7.4). Water was considered as control, and extracts were added to the above mixture; finally, in the end, 1 mL of sodium oxalate (25 mM) was added, and the clock was started. Absorbance at 620 nm for 10 min was measured and a standard graph.

## **Preparation of semi-permeable membrane from chicken eggs**

Among the 20 extracts screened, only the top five extracts (*Kalanchoe pinnata*, *Musa paradisiaca*, *Punica granatum*, *Coriandrum sativum*, and *Moringa oleifera*) were used for further *in vitro* anti-lithiatic egg membrane assay. The complete content of the eggs was removed by piercing with a glass rod on top of the eggs. Then these eggs were washed carefully with distilled water and were immersed in a beaker containing 2N HCL overnight for decalcification. The following day the semi-permeable membrane was cautiously removed from the shells rinsed with distilled water and neutralized with ammonia solution to remove any traces of acid from the membranes and finally rinsed with distilled water. Further, it was refrigerated at pH 7-7.4 condition to maintain moisture (Phatak and Hendre, 2015).

## **Synthesis of calcium oxalate through homogenous precipitation**

Calcium chloride dihydrate weighing 1.47g was dissolved using 100mL of distilled water, and 100mL of 2N H<sub>2</sub>SO<sub>4</sub> was used to dissolve 1.34g of sodium oxalate. Calcium oxalate starts precipitating with constant stirring when both the above solutions are mixed. Traces of sulphuric acid is removed by rinsing with ammonia solution and then finally rinsed with distilled water and kept for drying at 60°C for 4 hours (Monika et al., 2012). Calcium oxalate 1 mg/mL served as a negative control and a Cystone concentration of 20 mg/mL was set as a positive control (Phatak and Hendre, 2015). Further, the experimental groups were as follows, Negative control: 1 mL calcium oxalate + 1mL of distilled water, Positive control: 1 mL of calcium oxalate + 1 mL of Cystone solution, *Kalanchoe pinnata*: 1 mL of calcium oxalate + 500 µL of extract, *Punica granatum*: 1 mL of calcium oxalate + 500 µL of extract, *Musa paradisiaca*: 1 mL of calcium oxalate + 500 µL of extract, *Coriandrum sativum*: 1 mL of calcium oxalate + 500 µL of extract and *Moringa oleifera*: 1 mL of calcium oxalate + 500 µL of extract respectively.



The above-mentioned groups consisting of both positive and negative controls along with extracts were packed into respective semi-permeable membranes further the mouth of the membrane was tied with the help of thread and was immersed in a conical flask containing 100 mL of 0.1 M tris buffer. Incubator was preheated for 2 hours to obtain a constant temperature of 37°C; all the groups were placed inside the incubator for 7-8 hours (Phatak and Hendre, 2015). The contents of each group were transferred into a fresh flask, and 2 mL of 1N sulphuric acid was added and was titrated against 0.9494 N  $\text{KMnO}_4$  till the endpoint that is light pink color is observed. Percentage dissolution was calculated based on titration (Monika et al., 2012). Based on these results the best aqueous extract exhibiting anti-lithiatic activity was found to be *Kalanchoe pinnata* and further studies focused on this single phyto-fraction only.

### **Standard curve of calcium oxalate**

Potassium permanganate 3.2 g was dissolved in 1000 mL of distilled water and then boiled for 30 min. Later, filtered using Whatman filter paper to obtain 0.02M of  $\text{KMnO}_4$ . Different concentrations of calcium oxalate (0.2 mg/mL, 0.4 mg/mL, 0.6 mg/mL, 0.8 mg/mL, and 1 mg/mL) was used and the volume to 1 mL using distilled water. A 4 mL of sulphuric acid was added with 80  $\mu\text{L}$  of 0.02M  $\text{KMnO}_4$ . The above mixture was mixed well and incubated for 2 hours after which absorbance was read using a spectrophotometer at 620 nm. For all further analyses, only the best extract (*Kalanchoe pinnata*) was intervened to deduce the probable mechanism of calcium oxalate dissolution.

### **Nucleation assay**

The nucleation of calcium oxalate crystals was estimated using a spectrophotometer, and *Kalanchoe pinnata* inhibiting potency was determined by the method of Saha and Verma (2013), with minor alteration. Calcium chloride 4 mmol/L and sodium oxalate 50 mmol/L were mixed to initiate crystallization, and this was added to artificial urine. The solutions were prepared in Tris 0.05mol/L for calcium chloride and NaCl 0.15mol/L at pH 6.5 and 37°C for sodium oxalate. Nucleation rate was obtained by equating the time of crystal formation about the presence of varying concentrations of *Kalanchoe pinnata* and with no extract in another and also Cystone was used as the positive control, absorbance was recorded at 1 hour, 3 hours, and 24 hours at 620 nm, percentage inhibition was calculated accordingly.



## **Aggregation assay**

Saha and Verma (2013) method was tailored slightly to obtain the rate of aggregation of crystals of calcium oxalate. Calcium chloride and sodium oxalate 50 mmol/L solutions were mixed to obtain COM crystals. The two solutions were equalized by incubating in a water bath at 60°C for 1 hour and then brought to 37°C followed by evaporation. These crystals were brought to a concentration of 1 mg/mL by dissolving in 0.05 mol/L Tris and 0.15 mol/L NaCl at 6.5 pH. Different concentrations of *Kalanchoe pinnata* were used along with negative control and positive control being Cystone were observed under a light microscope.

## **RBC protection assay by *Kalanchoe pinnata* extract**

Consent from the healthy individual to procure erythrocytes was taken. The blood which was heparinized was centrifuged for 15 min at 1000g through which the buffy coat and plasma were separated, and the erythrocytes with the help of PBS were rinsed thrice at room temperature reintroduced into PBS for further analysis, and the volume was made up four times. For 5 min, *Kalanchoe pinnata* was incubated with erythrocytes and then further incubated for 1 hour at 37°C with hydrogen peroxide, ferric chloride, and ascorbic acid and kept in a shaker incubator for incubation and was observed under an optical microscope for any changes in the morphology (Beulah et al., 2015).

## **DNA protection assay by *Kalanchoe pinnata* extract**

Protocol from Meghashri et al., (2010) with slight variations was adapted to check the efficacy of *Kalanchoe pinnata* in protecting the DNA was checked using lambda phage DNA (Meghashri et al., 2010). In the presence or lack of *Kalanchoe pinnata* and gallic acid, the oxidation with the help of Fenton's reagent along with lambda DNA was estimated for 2 hours at 37°C. Electrophoresis was performed for the samples using 1% agarose gel at 50V DC for 2 hours and stained the gels using ethidium bromide and visualized using gel documentation.

## **High-Performance Liquid Chromatography (HPLC) Profiling**

The crude aqueous fraction, a hot extract of *Kalanchoe pinnata* was subjected to HPLC in a C-18 column with different mobile phase water: acetonitrile in the ratio 80:20 (Meghashri et al., 2010). The following standards were used to measure Ferulic acid

(321nm), Gallic acid (272nm), Rutin (257nm), Quercetin (257nm), and Vanillic acid (261nm) with 1mL/min flow rate.

## **Molecular Docking**

*In silico* analyses provides molecular insights (Ranganatha et al., 2014; Satapathy et al., 2020) on the interaction of ligands (phyto-molecules) with that of the receptors (target enzymes). In the current study, two major classes of targets were analyzed (1). The enzymes regulating redox machinery and (2). Enzymes involved in calcium oxalate regulation. Henceforth, four major antioxidant enzymes namely Superoxide dismutase (PDB: 2V0A), Peroxidase (PDB: 1PRX), Catalase (PDB: 5GKN), and Glutathione S-Transferase (PDB: 1LJR) were retrieved from Protein Data Bank (PDB). This was backed up by metabolic enzymes Alanine-Glyoxylate aminotransferase (PDB: 1HOC), Oxalyl-Coa decarboxylase (PDB: 2JIB), D-glycerate dehydrogenase (PDB: 1GDH), and Lactate dehydrogenase (PDB: 5ZJF) were considered respectively. Four major ligand molecules were docked on the catalytic site of the receptors based on the HPLC profiling *i.e.*, Gallic acid (PubChem: 370), Vanillic acid (PubChem: 8468), Rutin (PubChem: 5280805), and Potassium Magnesium Citrate (PubChem: 10437763) among which the latter served as the standard drug which is currently used for treating kidney stones. Molegro Docking software package was used with visual docker and the results were analyzed considering the atomic contact energy (ACE) and gliding values (Rakesh et al., 2015, 2016; Satapathy et al., 2020).

## **Statistical analysis**

All data were expressed as mean  $\pm$  standard deviation ( $n = 3$ ). Results were determined using one-way analysis of variance (ANOVA), followed by Duncan's multiple range test using GraphPad Software, Inc (version 6.0, California, USA). The results were considered statistically significant if the  $P < 0.05$ . The minimum dosage of extract that is necessary to produce 50% inhibition was known as the effective dose ( $ED_{50}$ ), which is calculated using regression analysis.

## **Results & Discussion**

Phytofractions are extensively used as nutraceuticals in complementary and alternative medicine to boost health and to prevent stress, inflammation, and secondary lifestyle diseases. The current study investigates the interconnection of antioxidants and regulation of calcium oxalate which is a burgeoning area of research that is gaining increased

attention due to the increased number of urolithiasis cases globally. We examined the ability of naturally occurring plant-derived aqueous fractions for their anti-stress and anti-urolithiatic efficacy in the prevention and treatment of the disease using *in vitro* and *in silico* platforms.

With the background of Indian traditional medicine (Ayurveda) and folklore, twenty priority botanicals with various other bioactivities were selected namely *Aegle marmelos*, *Apium graveolens*, *Artocarpus heterophyllus*, *Azadirachta indica*, *Citrus limon*, *Citrus sinensis*, *Coriandrum sativum*, *Cucumis sativus*, *Kalanchoe pinnata*, *Lawsonia inermis*, *Mangifera indica*, *Manilkara zapota*, *Momordica charantia*, *Moringa oleifera*, *Musa paradisiaca*, *Phyllanthus emblica*, *Plectranthus amboinicus*, *Psidium guajava*, *Punica granatum* and *Ribes Uva-crispa* (table 1) and their leaves component were screened for their antioxidant and anti-urolithiatic potency using aqueous hot extraction method. This extraction method was intentionally used with the purpose to formulate homemade decoctions with the motto of making food as medicine. The phyto-cocktails from all 20 extracts were subjected to qualitative phytochemical profiling for the presence of carbohydrates, glycosides, alkaloids, phenols, flavonoids, tannins, triterpenoids, steroids, saponin, and gums (supplementary table 1). Among them, most of the aqueous extract was found to be composed of the above-mentioned phytochemical classes. However, glycosides and steroids were absent in most of the extracts indicating the non-dissolution of hydrophobic phyto-molecules. Most of the hydrophilic phyto-molecules (tight and loosely bound secondary metabolites) were extracted during the procedure. This observation implies an increased bioavailability of the phytococktail with enhanced bioabsorption within the system. All aqueous extracts were further subjected to the estimation of total phenolic content (TPC) to ensure the quantitative measurements (figure 1). Among the 20 leaves extracts *P.granatum*, *M.oleifera*, *P.guajava*, and *C.sativum* contented higher levels (nearing 2 mg/mL) whereas, *M.charantia* and *C.sativus* exhibited the least (nearing 0.5 mg/mL) phenolic content. The rest of the 14 extracts possessed (a range between 1 to 1.5 mg/mL) of phenolics. For all dose-dependent studies, TPC was considered for quantitation.

Oxyradicals majorly reactive oxygen species (ROS) and reactive nitrogen species (RNS) are generated during metabolic insult and are the prime cause for biomolecular dysregulation, cellular damage, accounting for cell membrane disruption, mitochondrial dysbiosis, protein folding, inflammation leading to a high frequency of time-dependent diseases like early aging, cancer and neurodegenerative disorders which hampers general health maintenance. According to Vina and co-workers (2005), oxidants are the primordial

cause for any disorders. Striking a proper equilibrium with antioxidant molecules will largely facilitate the chances of better survival. Hence a quest for exploring potent phyto-antioxidants is an urgent necessity to overcome lifestyle-related diseases (Garg et al., 2020). In the current study, all the 20 aqueous hot leaf extracts were subjected for their efficacy to quench free radical scavenging (figure 2) in a dose-dependent manner at 5µg/mL, 15µg/mL, and 25µg/mL of TPC respectively. DPPH (figure 2A), metal chelating (figure 2B), and reducing power (figure 2C) assays were employed. Ethylenediaminetetraacetic acid (EDTA) was used as a standard for metal chelating assay and gallic acid was used as the standard for the other two assays. In DPPH assay, *A.indica*, *K.pinnata*, *P.granatum*, and *P.emblica* were found to have better free radical scavenging activity. Whereas, *A.graveolens*, *C.sativum*, *C.sativus*, and *P.amboinicus* indicated the least activity among the 20 screened botanicals (figure 2A). However, *M.zapota*, *M.charantia*, and *M.oleifera* exhibited better metal chelating ability. Further, *A.indica* and *C.sativus* showed the least activity among the screened phytoextracts (figure 2B). The reducing power assay was well responded with *C.limon*, *K.pinnata*, *L.inermis*, *M.indica*, *P.emblica*, and *P.granatum* extracts and on the contrary, *A.heterophyllus*, *C.sativus*, *M.charantia*, *P.amboinicus*, and *P.guajava* exhibited the least activity (figure 2C). Similar results (Bidchol et al., 2011; Wong et al., 2014; Nedamani et al., 2015) have been well document by the previous researchers.

Besides, the antioxidant potency, the 20 selected botanicals with a concentration of 25µg/mL were subjected to spectral studies, to assess their ability in inhibiting calcium oxalate crystal formation with cystone as the standard herbal drug (figure 3). The results exhibited that among the screened extracts *C.sativum*, *K.pinnata*, *M.oleifera*, and *M.paradisiaca*, were found to have evidence in inhibiting calcium oxalate crystal formation. Henceforth for all further studies, these five aqueous phytoextracts were considered. Further, the top five extracts were subjected to an *in vitro* experimental chicken egg membrane model to mimic the dissolution across the biological membrane (figure 4) of which *K.pinnata* exhibited 71% dissolution than other extracts in comparison to cystone standard (86%). Hence for all the further experimentation leaves aqueous hot extract of *K.pinnata* was used and subjected to critical analyses.

Nucleation and aggregation are the two major phases during lithiasis. To assess the sequential effectiveness of *K.pinnata*, the extract was subjected in a dose-dependent manner at a range of concentrations (5µg/mL, 10µg/mL, 15µg/mL, 20µg/mL, and 25µg/mL) respectively with 25µg/mL of cystone as standard drug formulation. The calcium oxalate

curve was considered as untreated standard (supplementary figure 1) The nucleation assay was assessed at 1h, 3h, and 24 h after incubation (figure 5A). The results provided sufficient evidence that after 24 h of incubation a promising inhibition (70%) of calcium oxalate was observed with *K.pinnata* extract compared to cystone (76%). Further, aggregation assessment was also performed to have a microscopic birds' eye view on the crystal dissolution (figure 5B). Thus, *K.pinnata* extract was found to be a potent anti-crystallization contributor. This could be probably due to higher concentrations of flavonoids, saponins, and gums (Van-Dooren et al., 2016) which has a shred of qualitative evidence with phytochemical profiling (supplementary table 1).

Further, to evaluate the toxicity of the *K.pinnata* extract RBC (figure 6: Panel A) and DNA (figure 6: Panel B) protection assay were performed. The *K.pinnata* phyto-cocktail exhibited potential hampering of the induced oxidant partially at 5 $\mu$ g/mL and completely at 25 $\mu$ g/mL in comparison to gallic acid (pure drug) and cystone (formulation) as standard drug. Similar kind of studies has been evident with Beulah et al., (2015) and Meghashri et al., (2010) respectively. HPLC profiling was performed (figure 7) on aqueous *K.pinnata* leaves extract. The sample was found to contain gallic acid at 272nm, rutin at 257nm, and vanillic acid at 261nm whereas, ferulic acid and quercetin were present in minor quantities. The chromatogram for standards has been provided in supplementary figure 2.

Inside a cell, biomarkers such as antioxidant, inflammatory, and calcium oxalate regulating metabolic enzymes play a pivotal role in maintaining cellular homeostasis during lithiasis. Hence an attempt was made to investigate these two classes of enzymes namely catalase (CAT), superoxide dismutase (SOD), peroxidase (PER), glutathione S-transferase (GST), contributing towards redox machinery and stress respectively. Besides, metabolic enzymes such as alanine-glyoxlate aminotransferase, oxalyl-coA decarboxylase, D-glycerate dehydrogenase, and lactate dehydrogenase (LDH) regulate a crucial role in stone formation, and inflammation was considered for the study. Three major ligands namely, gallic acid, rutin, and vanillic acid were considered with potassium-magnesium citrate as the standard-currently used drug for urolithiasis. Structure-activity relationship (SAR) studies were performed for antioxidant (figure 8) and calcium oxalate regulating enzymes (figure 9) with the best-docked pose. Further, the data have been tabulated in table 2 and table 3 respectively indicating the specific amino acid which comprises the active site for the target and ligand. Among the docked ligands rutin (molar mass: 610.517 g/mol) was found to be active and best docked on both the classes of the target enzymes than compared to the available drug

currently used by clinicians to treat uro/nephrolithiasis. Previous studies on rutin as a potent antioxidant and anti-urolithiatic agent have been well document by Enogieru, et al., (2018) and Ghodasara et al., (2010) respectively. Further, Radwan et al (2021) and Santos et al., (2021) have explored the possible role of the *K. pinnata* attributes in hemostasis and oxytocin signaling pathways respectively.

Finally, to summarize, the current study has made an exciting observation that *K.pinnata* aqueous leaves extract can completely suppress the clinical disease in an experimental *in vitro* model of urolithiasis. However, further studies at a molecular level are needed to test the central hypothesis that *K. pinnata* has a profound effect on pro- and anti-inflammatory responses regulating transcriptional activity which may lead to the amelioration of the disease. Newer *in silico* algorithms have to be generated which can target gene prediction and pathways that are dysregulated during urolithiasis. In conclusion, these studies should provide novel insights into the basic mechanisms through which phyto-cocktails exhibits anti-lithiatic properties so that it can be used against a wide range of lifestyle diseases leading to better health and wellbeing.

**Conflict of Interest:** All authors declare no conflict of interest.

**Acknowledgments:**

Ms. Aishwarya Tripurasundari Devi would like to thank the Indian Council of Medical Research (ICMR) for the award of Senior Research Fellow (SRF) Award Letter Number - File no.5/3/8/55/ITR-F/2018-ITR dated 11.6.2018. The authors thank, Dr. Trevani, Herbarium Section, Department of Studies in Botany, University of Mysore, for identification of the screened botanicals. All authors thank the Hon'ble Vice-Chancellor, JSS Science and Technology University, Principal, SJCE, Mysore for his encouragement, and JSS research foundation for their constant inspiration. All the authors are thankful to Dr. Shaukath Ara Khanum, Department of Chemistry, Yuvaraja College, and Dr. Shubha Gopal, Department of Studies in Microbiology, University of Mysore, Mysore for the long-term collaboration and guidance in understanding the biology of phytochemical molecules. Further, we extend our gratitude towards the management and office bearers of Dayananda Sagar University (DSU), Bengaluru, Karnataka, India, for constant inspiration, motivation, and encouragement to pursue scientific research. Special thanks to Prof. Sunil S. More, Dean, School of Basic and Applied Sciences, DSU for all approval and permissions during the execution of this research work.



## References:

Janardhan B, Shrikanth VM, More VS, Melappa G, Zameer F, More SS. *Bungarus caeruleus* venom neutralization activity of *Azima tetracantha* Lam. Extract. *Heliyon*. 2019 Jul 29;5(7):e02163.

Vineetha MS, Bhavya J, Veena SM, Mirajkar KK, Muddapur U, Ananthraju KS, Zameer F, More SS. *In vitro* and *in vivo* inhibitory effects of *Tabernaemontana alternifolia* against *Naja naja* venom. *Saudi Pharm J*. 2020 Jun;28(6):692-697.

Bhavya J, Vineetha M, Shrikanth, Veena SM, Govindappa Melappa, Ananthraju KS, Zameer F and More SS. Inhibitory Effect of *Carissa spinarum* Linn methanolic leaf extract against *Vipera russelli*. *Venoms and Toxins* (2021) 1: 85.

Kunnel SG, Subramanya S, Satapathy P, Sahoo I, Zameer F. Acrylamide Induced Toxicity and the Propensity of Phytochemicals in Amelioration: A Review. *Cent Nerv Syst Agents Med Chem*. 2019;19(2):100-113.

Satapathy P, Prakash JK, Gowda VC, More SS, K M, Chandramohan V, Zameer F. Targeting Imd pathway receptor in *Drosophila melanogaster* and repurposing of phyto-inhibitors: structural modulation and molecular dynamics. *J Biomol Struct Dyn*. 2020 Oct 14:1-12.

Putta S, Yarla NS, Kilari EK, Surekha C, Aliev G, Divakara MB, Santosh MS, Ramu R, Zameer F, Mn NP, Chintala R, Rao PV, Shiralgi Y, Dhananjaya BL. Therapeutic Potentials of Triterpenes in Diabetes and its Associated Complications. *Curr Top Med Chem*. 2016;16(23):2532-42.

Prasad A, Devi AT, Prasad MNN, Zameer F, Shruthi G, Shivamallu C. Phyto anti-biofilm elicitors as potential inhibitors of *Helicobacter pylori*. *3 Biotech*. 2019 Feb;9(2):53.

Rakesh KS, Jagadish S, Swaroop TR, Mohan CD, Ashwini N, Harsha KB, Zameer F, Girish KS, Rangappa KS. Anti-Cancer Activity of 2,4-Disubstituted Thiophene Derivatives: Dual Inhibitors of Lipoxygenase and Cyclooxygenase. *Med Chem*. 2015;11(5):462-72.

Zameer F, Rukmangada MS, Chauhan JB, Khanum SA, Kumar P, Devi AT, Mn NP, Bl D. Evaluation of adhesive and anti-adhesive properties of *Pseudomonas aeruginosa* biofilms and their inhibition by herbal plants. *Iran J Microbiol*. 2016 Apr;8(2):108-19.

Rakesh KS, Jagadish S, Balaji KS, Zameer F, Swaroop TR, Mohan CD, Jayarama S, Rangappa KS. 3,5-Disubstituted Isoxazole Derivatives: Potential Inhibitors of Inflammation and Cancer. *Inflammation*. 2016 Feb;39(1):269-280.

Grases, F., Sanchis, P., Isern, B., Perelló, J., & Costa-Bauzá, A. (2007). Uric acid as inducer of calcium oxalate crystal development. *Scand J Urol Nephrol*. 41, 1, 26–31.

Tatapudi VS, Modersitzki F, Marineci S, Josephson MA, Goldfarb DS. Medical evaluation of living kidney donors with nephrolithiasis: a survey of practices in the United States. *Clin Exp Nephrol*. 2020 Mar;24(3):259-267.



Han, H., Segal, A. M., Seifiter, J. L. & Dwyer, J. T. (2015). Nutritional management of kidney stones (nephrolithiasis). *Clin Nutr Res.* 4, 3, 137-152.

Paliouras, C., Tsampikaki, E., Alivannis, P. & Aperis, G. (2012). Pathophysiology of nephrolithiasis. *Nephrology Research & Reviews.* 4, 2, 58-65.

Moe, O. W. (2006). Kidney stones: pathophysiology and medical management. *Lancet.* 367, 9507, 333-344.

Evan AP, Worcester EM, Coe FL, Williams J Jr, Lingeman JE. Mechanisms of human kidney stone formation. *Urolithiasis.* 2015 Jan;43 Suppl 1(0 1):19-32.

Phatak RS and Hendre AS. In-vitro anti-urolithiatic activity of *Kalanchoe pinnata* extract. *International Journal of Pharmacognosy and Phytochemical Research* 2015; 7(2); 275-279.

Pynam H, Dharmesh SM. Antioxidant and anti-inflammatory properties of marmelosin from Bael (*Aegle marmelos* L.); Inhibition of TNF- $\alpha$  mediated inflammatory/tumor markers. *Biomed Pharmacother.* 2018 Oct;106:98-108.

Chonpathompikunlert P, Boonruamkaew P, Sukketsiri W, Hutamekalin P, Sroyraya M. The antioxidant and neurochemical activity of *Apium graveolens* L. and its ameliorative effect on MPTP-induced Parkinson-like symptoms in mice. *BMC Complement Altern Med.* 2018 Mar 20;18(1):103.

Ranasinghe RASN, Maduwanthi SDT, Marapana RAUJ. Nutritional and Health Benefits of Jackfruit (*Artocarpus heterophyllus* Lam.): A Review. *Int J Food Sci.* 2019 Jan 6;2019:4327183.

Saleem S, Muhammad G, Hussain MA, Bukhari SNA. A comprehensive review of phytochemical profile, bioactives for pharmaceuticals, and pharmacological attributes of *Azadirachta indica*. *Phytother Res.* 2018 Jul;32(7):1241-1272.

Prabhu VV, Sathyamurthy D, Ramasamy A, Das S, Anuradha M, Pachiappan S. Evaluation of protective effects of diosmin (a citrus flavonoid) in chemical-induced urolithiasis in experimental rats. *Pharm Biol.* 2016 Sep;54(9):1513-21.

Ungjaroenwathana W, Chiramongkolsiri T, Dissayabutra T, Boonla C, Prapunwattana P, Tungsanga K, Tosukhowong P. Lime powder regimen supplement alleviates urinary metabolic abnormalities in urolithiasis patients. *Nephrology (Carlton).* 2019 Aug;24(8):791-797.

Laribi B, Kouki KM, Hamdi M, Bettaieb T. Coriander (*Coriandrum sativum* L.) and its bioactive constituents. *Fitoterapia.* 2015 Jun;103:9-26.

Trejo-Moreno C, Méndez-Martínez M, Zamilpa A, Jiménez-Ferrer E, Perez-García MD, Medina-Campos ON, Pedraza-Chaverri J, Santana MA, Esquivel-Guadarrama FR, Castillo A, Cervantes-Torres J, Fragoso G, Rosas-Salgado G. *Cucumis sativus* Aqueous Fraction Inhibits

Angiotensin II-Induced Inflammation and Oxidative Stress *In Vitro*. *Nutrients*. 2018 Feb 28;10(3):276.

Sohgaura AK, Bigoniya P, Shrivastava B. *In Vitro* Antilithiatic Potential of *Kalanchoe pinnata*, *Embllica officinalis*, *Bambusa nutans*, and *Cynodon dactylon*. *J Pharm Bioallied Sci*. 2018 Apr-Jun;10(2):83-89.

Ferreira RT, Coutinho MA, Malvar Ddo C, Costa EA, Florentino IF, Costa SS, Vanderlinde FA. Mechanisms Underlying the Antinociceptive, Antiedematogenic, and Anti-Inflammatory Activity of the Main Flavonoid from *Kalanchoe pinnata*. *Evid Based Complement Alternat Med*. 2014;2014:429256.

Elansary HO, Szopa A, Kubica P, Ekiert H, Al-Mana F, Al-Yafsi MA. Antioxidant and Biological Activities of *Acacia saligna* and *Lawsonia inermis* Natural Populations. *Plants (Basel)*. 2020 Jul 17;9(7):908.

Batool N, Ilyas N, Shabir S, Saeed M, Mazhar R. Mini-Review- A mini-review of therapeutic potential of *Mangifera indica* L. *Pak J Pharm Sci*. 2018 Jul;31(4):1441-1448.

Sharma B, Singh I, Bajar S, Gupta S, Gautam H, Kumar P. Biogenic Silver Nanoparticles: Evaluation of Their Biological and Catalytic Potential. *Indian J Microbiol*. 2020 Dec;60(4):468-474.

Jia S, Shen M, Zhang F, Xie J. Recent Advances in *Momordica charantia*: Functional Components and Biological Activities. *Int J Mol Sci*. 2017 Nov 28;18(12):2555.

Karadi RV, Gadge NB, Alagawadi KR, Savadi RV. Effect of *Moringa oleifera* Lam. root-wood on ethylene glycol induced urolithiasis in rats. *J Ethnopharmacol*. 2006 Apr 21;105(1-2):306-11.

Bhattacharya A, Tiwari P, Sahu PK, Kumar S. A Review of the Phytochemical and Pharmacological Characteristics of *Moringa oleifera*. *J Pharm Bioallied Sci*. 2018 Oct-Dec;10(4):181-191.

Panigrahi PN, Dey S, Sahoo M, Dan A. Antiurolithiatic and antioxidant efficacy of *Musa paradisiaca* pseudostem on ethylene glycol-induced nephrolithiasis in rat. *Indian J Pharmacol*. 2017 Jan-Feb;49(1):77-83.

Krishnaveni M, Mirunalini S. Therapeutic potential of *Phyllanthus emblica* (amla): the ayurvedic wonder. *J Basic Clin Physiol Pharmacol*. 2010;21(1):93-105.

Li W, Zhang X, Chen R, Li Y, Miao J, Liu G, Lan Y, Chen Y, Cao Y. HPLC fingerprint analysis of *Phyllanthus emblica* ethanol extract and their antioxidant and anti-inflammatory properties. *J Ethnopharmacol*. 2020 May 23;254:112740.

Arumugam G, Swamy MK, Sinniah UR. *Plectranthus amboinicus* (Lour.) Spreng: Botanical, Phytochemical, Pharmacological and Nutritional Significance. *Molecules*. 2016 Mar 30;21(4):369.

Agarwal K, Varma R. Ethnobotanical study of antilithic plants of Bhopal district. J Ethnopharmacol. 2015 Nov 4;174:17-24.

Vasconcelos AG, Amorim ADGN, Dos Santos RC, Souza JMT, de Souza LKM, Araújo TSL, Nicolau LAD, de Lima Carvalho L, de Aquino PEA, da Silva Martins C, Ropke CD, Soares PMG, Kuckelhaus SAS, Medeiros JR, Leite JRSA. Lycopene rich extract from red guava (*Psidium guajava* L.) displays anti-inflammatory and antioxidant profile by reducing suggestive hallmarks of acute inflammatory response in mice. Food Res Int. 2017 Sep;99(Pt 2):959-968.

Rathod NR, Biswas D, Chitme HR, Ratna S, Muchandi IS, Chandra R. Anti- urolithiatic effects of *Punica granatum* in male rats. J Ethnopharmacol. 2012 Mar 27;140(2):234-8.

Saeed M, Naveed M, BiBi J, Kamboh AA, Arain MA, Shah QA, Alagawany M, El-Hack MEA, Abdel-Latif MA, Yatoo MI, Tiwari R, Chakraborty S, Dhama K. The Promising Pharmacological Effects and Therapeutic/Medicinal Applications of *Punica Granatum* L. (Pomegranate) as a Functional Food in Humans and Animals. Recent Pat Inflamm Allergy Drug Discov. 2018;12(1):24-38.

Laczkó-Zöld E, Komlósi A, Ülkei T, Fogarasi E, Croitoru M, Fülöp I, Domokos E, Ștefănescu R, Varga E. Extractability of polyphenols from black currant, red currant and gooseberry and their antioxidant activity. Acta Biol Hung. 2018 Jun;69(2):156-169.

Pankaj S, S. Aishwarya, M. Rashmi Shetty, N. Akshaya Simha, G. Dhanapal, R. Aishwarya Shree, Antara Biswas, K. Kounaina, Anirudh G. Patil, M.G. Avinash, Aishwarya T. Devi, Shubha Gopal, M.N. Nagendra Prasad, S.M. Veena, S.P. Hudeda, K. Muthuchelian, Sunil S. More, Govindappa Melappa and Farhan Zameer. Phyto-Nano-Antimicrobials: Synthesis, Characterization, Discovery, and Advances. Frontiers in Anti-Infective Drug Discovery; Bentham Science International, 2020, 8 (36), 196-231.

Khan K, S Aishwarya, Pankaj Satapathy, Veena SM, Govindappa Melappa, Farhan Zameer, Shivaprasad Hudeda and Sunil S. More. Exploration of Dill Seeds (*Anethum Graveolens*): An Ayurpharmacomic Approach. Science of Spices and Culinary Herbs - Latest Laboratory, Pre-clinical, and Clinical Studies. Bentham Science International. 2020, 37(2), 116-152.

Aishwarya S., Kounaina Khan, Anirudh Gururaj Patil, Pankaj Satapathy, Aishwarya T. Devi, M.G. Avinash, S.M. Veena, Shubha Gopal, M.N. Nagendra, K. Muthucheliyan, Shivaprasad Hudeda, Farhan Zameer and Sunil S. More. Nutraceutical Attributes of *Tamarindus indica* L. - Devils' Tree with Sour Date. Science of Spices and Culinary Herbs - Latest Laboratory, Pre-clinical, and Clinical Studies. Bentham Science International. 2020, 33(3), 33-65.

Gulcin, İ. Antioxidants and antioxidant methods: an updated overview (2020). Arch Toxicol 94, 651–715.

Gopal S, Srinivas V, Zameer F, Kreft J. Prediction of proteins putatively involved in the thiol: disulfide redox metabolism of a bacterium (*Listeria*): the CXXC motif as query sequence. In Silico Biol. 2009;9(5-6):407-14.

Ramu R, Shirahatti PS, Anilakumar KR, Nayakavadi S, Zameer F, Dhananjaya BL, Nagendra Prasad MN. Assessment of Nutritional Quality and Global Antioxidant Response of Banana (*Musa sp.* Nanjangud Rasa Bale) Pseudostem and Flower. *Pharmacognosy Res.* 2017 Dec;9(Suppl 1): S74-S83.

Madhusudhan M, Zameer F, Naidu A, M N NP, Dhananjaya BL, Hegdekatte R. Evaluating the inhibitory potential of *Withania somnifera* on platelet aggregation and inflammation enzymes: An *in vitro* and *in silico* study. *Pharm Biol.* 2016 Sep;54(9):1936-41.

Meghashri S, JB Chauhan, AA Syed, F Zameer. Effect of *Ocimum tenuiflorum* Leaf Extract against Infective Endocarditis. *International Journal of Phytomedicine.* 2011 (3), 470-474

Meghashri S, Kumar VH, Gopal S. Antioxidant properties of a novel flavonoid from leaves of *Leucas aspera*. *Food Chemistry.* 2010, 122(1): 105-110.

Nedamani RE, Sadeghi Mahoonak A, Ghorbani M, Kashaninejad M. Evaluation of antioxidant interactions in combined extracts of green tea (*Camellia sinensis*), rosemary (*Rosmarinus officinalis*) and oak fruit (*Quercus branti*). *J Food Sci Technol.* 2015 Jul;52(7):4565-71.

Shameh S, Hosseini B, Alirezalu A, Maleki R. Phytochemical Composition and Antioxidant Activity of Petals of Six Rosa Species from Iran. *J AOAC Int.* 2018 Nov 1;101(6):1788-1793.

Monika, J., Bhandari, A., Bhandari, A., Patel, P (2012). Isolation, characterization and *in vitro* antiurolithiatic activity of Cerpegin alkaloid from *Ceropegia bulbosa* var. Lushii root. *International Journal of Drug Development and Research* 4(4): 154-160.

Saha, S. and R. J. Verma (2013). Inhibition of calcium oxalate crystallisation *in vitro* by an extract of *Bergenia ciliata*. *Arab journal of urology* 11(2): 187-192.

Beulah KC, Aishwarya T Devi, Waseem K, Hedgekatte R, Nagendra Prasad MN, Dhananjaya BL, Farhan Zameer (2015). Screening for Bioactives from Indian Medicinal Herbs – A Simplistic Approach for antioxidant metabolites. *International Journal of Pharmacy and Pharmaceutical Sciences* 7(1), 195-198.

Ranganatha VL, Begum AB, Naveen P, Zameer F, Hegdekatte R, Khanum SA. Synthesis, xanthine oxidase inhibition, and antioxidant screening of benzophenone tagged thiazolidinone analogs. *Arch Pharm (Weinheim).* 2014 Aug;347(8):589-98.

Viña J, Borrás C, Gambini J, Sastre J, Pallardó FV. Why females live longer than males? Importance of the upregulation of longevity-associated genes by oestrogenic compounds. *FEBS Lett.* 2005 May 9;579(12):2541-5.

Garg SS, Gupta J, Sharma S, Sahu D. An insight into the therapeutic applications of coumarin compounds and their mechanisms of action. *Eur J Pharm Sci.* 2020 Sep 1;152:105424.

Wong FC, Yong AL, Ting EP, Khoo SC, Ong HC, Chai TT. Antioxidant, Metal Chelating, Anti-glucosidase Activities and Phytochemical Analysis of Selected Tropical Medicinal Plants. *Iran J Pharm Res.* 2014;13(4):1409-15.

Bidchol, A. M., Wilfred A, Abhijna P, Harish R (2011). Free radical scavenging activity of aqueous and ethanolic extract of *Brassica oleracea* L. var. *italica*. *Food and bioprocess technology* 4(7): 1137-1143.

Van Dooren I, Foubert K, Bijttebier S, Theunis M, Velichkova S, Claeys M, Pieters L, Exarchou V, Apers S. Saponins and Flavonoids from an Infusion of *Herniaria hirsuta*. *Planta Med.* 2016 Dec;82(18):1576-1583.

Enogieru AB, Haylett W, Hiss DC, Bardien S, Ekpo OE. Rutin as a Potent Antioxidant: Implications for Neurodegenerative Disorders. *Oxid Med Cell Longev.* 2018 Jun 27;2018:6241017.

Ghudasara J, Pawar A, Deshmukh C, Kuchekar B. Inhibitory effect of rutin and curcumin on experimentally-induced calcium oxalate urolithiasis in rats. *Pharmacognosy Res.* 2010 Nov;2(6):388-92.

Radwan PJ, Janus L, Piatkowski M, Sierakowska A, Galek T, Szajna E, Bogdal D, Tupaj M. Fungal Chitosan-Derived biomaterials modified with *Kalanchoe pinnata* as potential hemostatic agents-development and characterization. *Polymers (Basel).* 2021 Apr 15;13(8):1300.

Santos S, Zurfluh L, Mennet M, Potterat O, von Mandach U, Hamburger M, Simões-Wust AP. *Bryophyllum pinnatum* compounds inhibit oxytocin-induced signaling pathways in human myometrial cells. *Front Pharmacol.* 2021 Feb 18;12:632986.



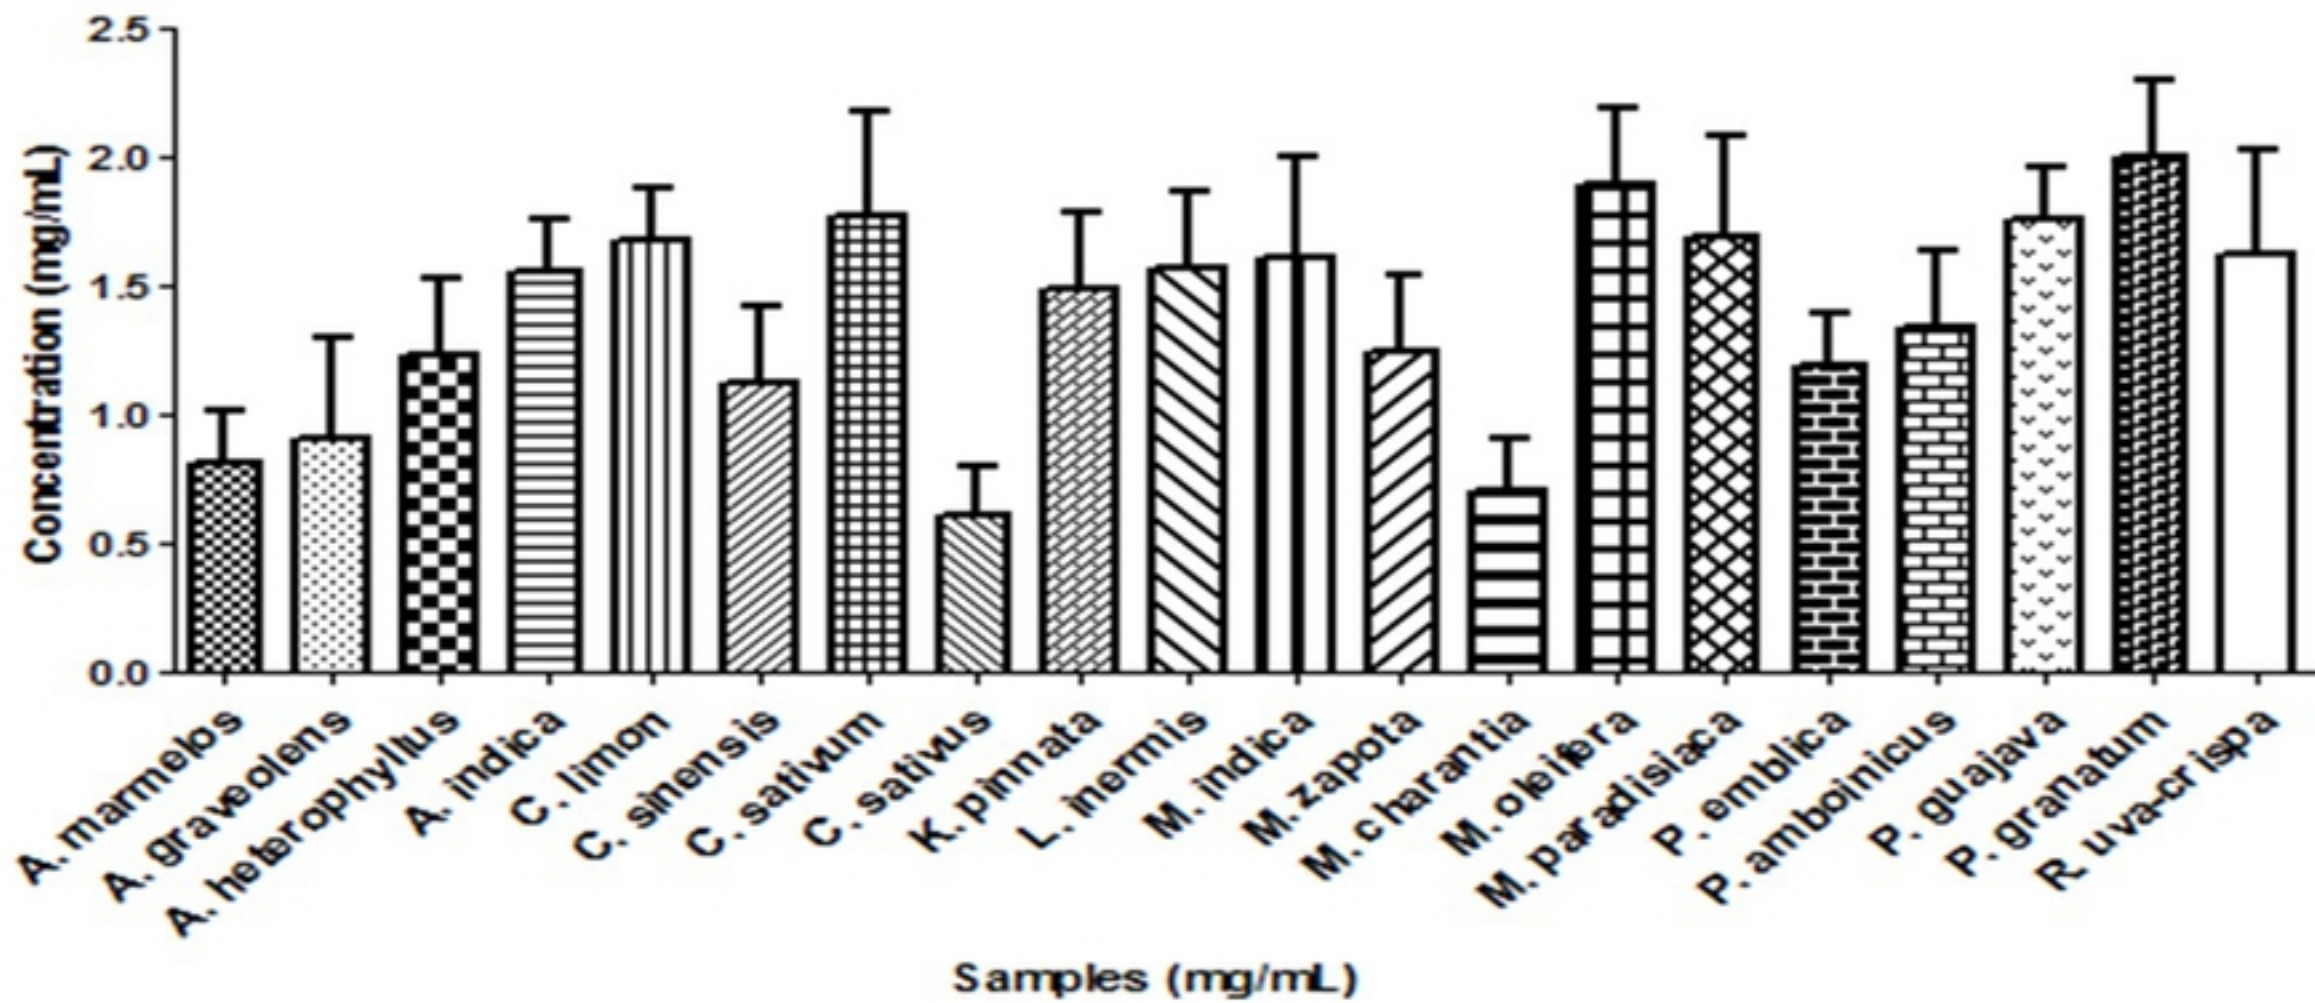

Figure 1

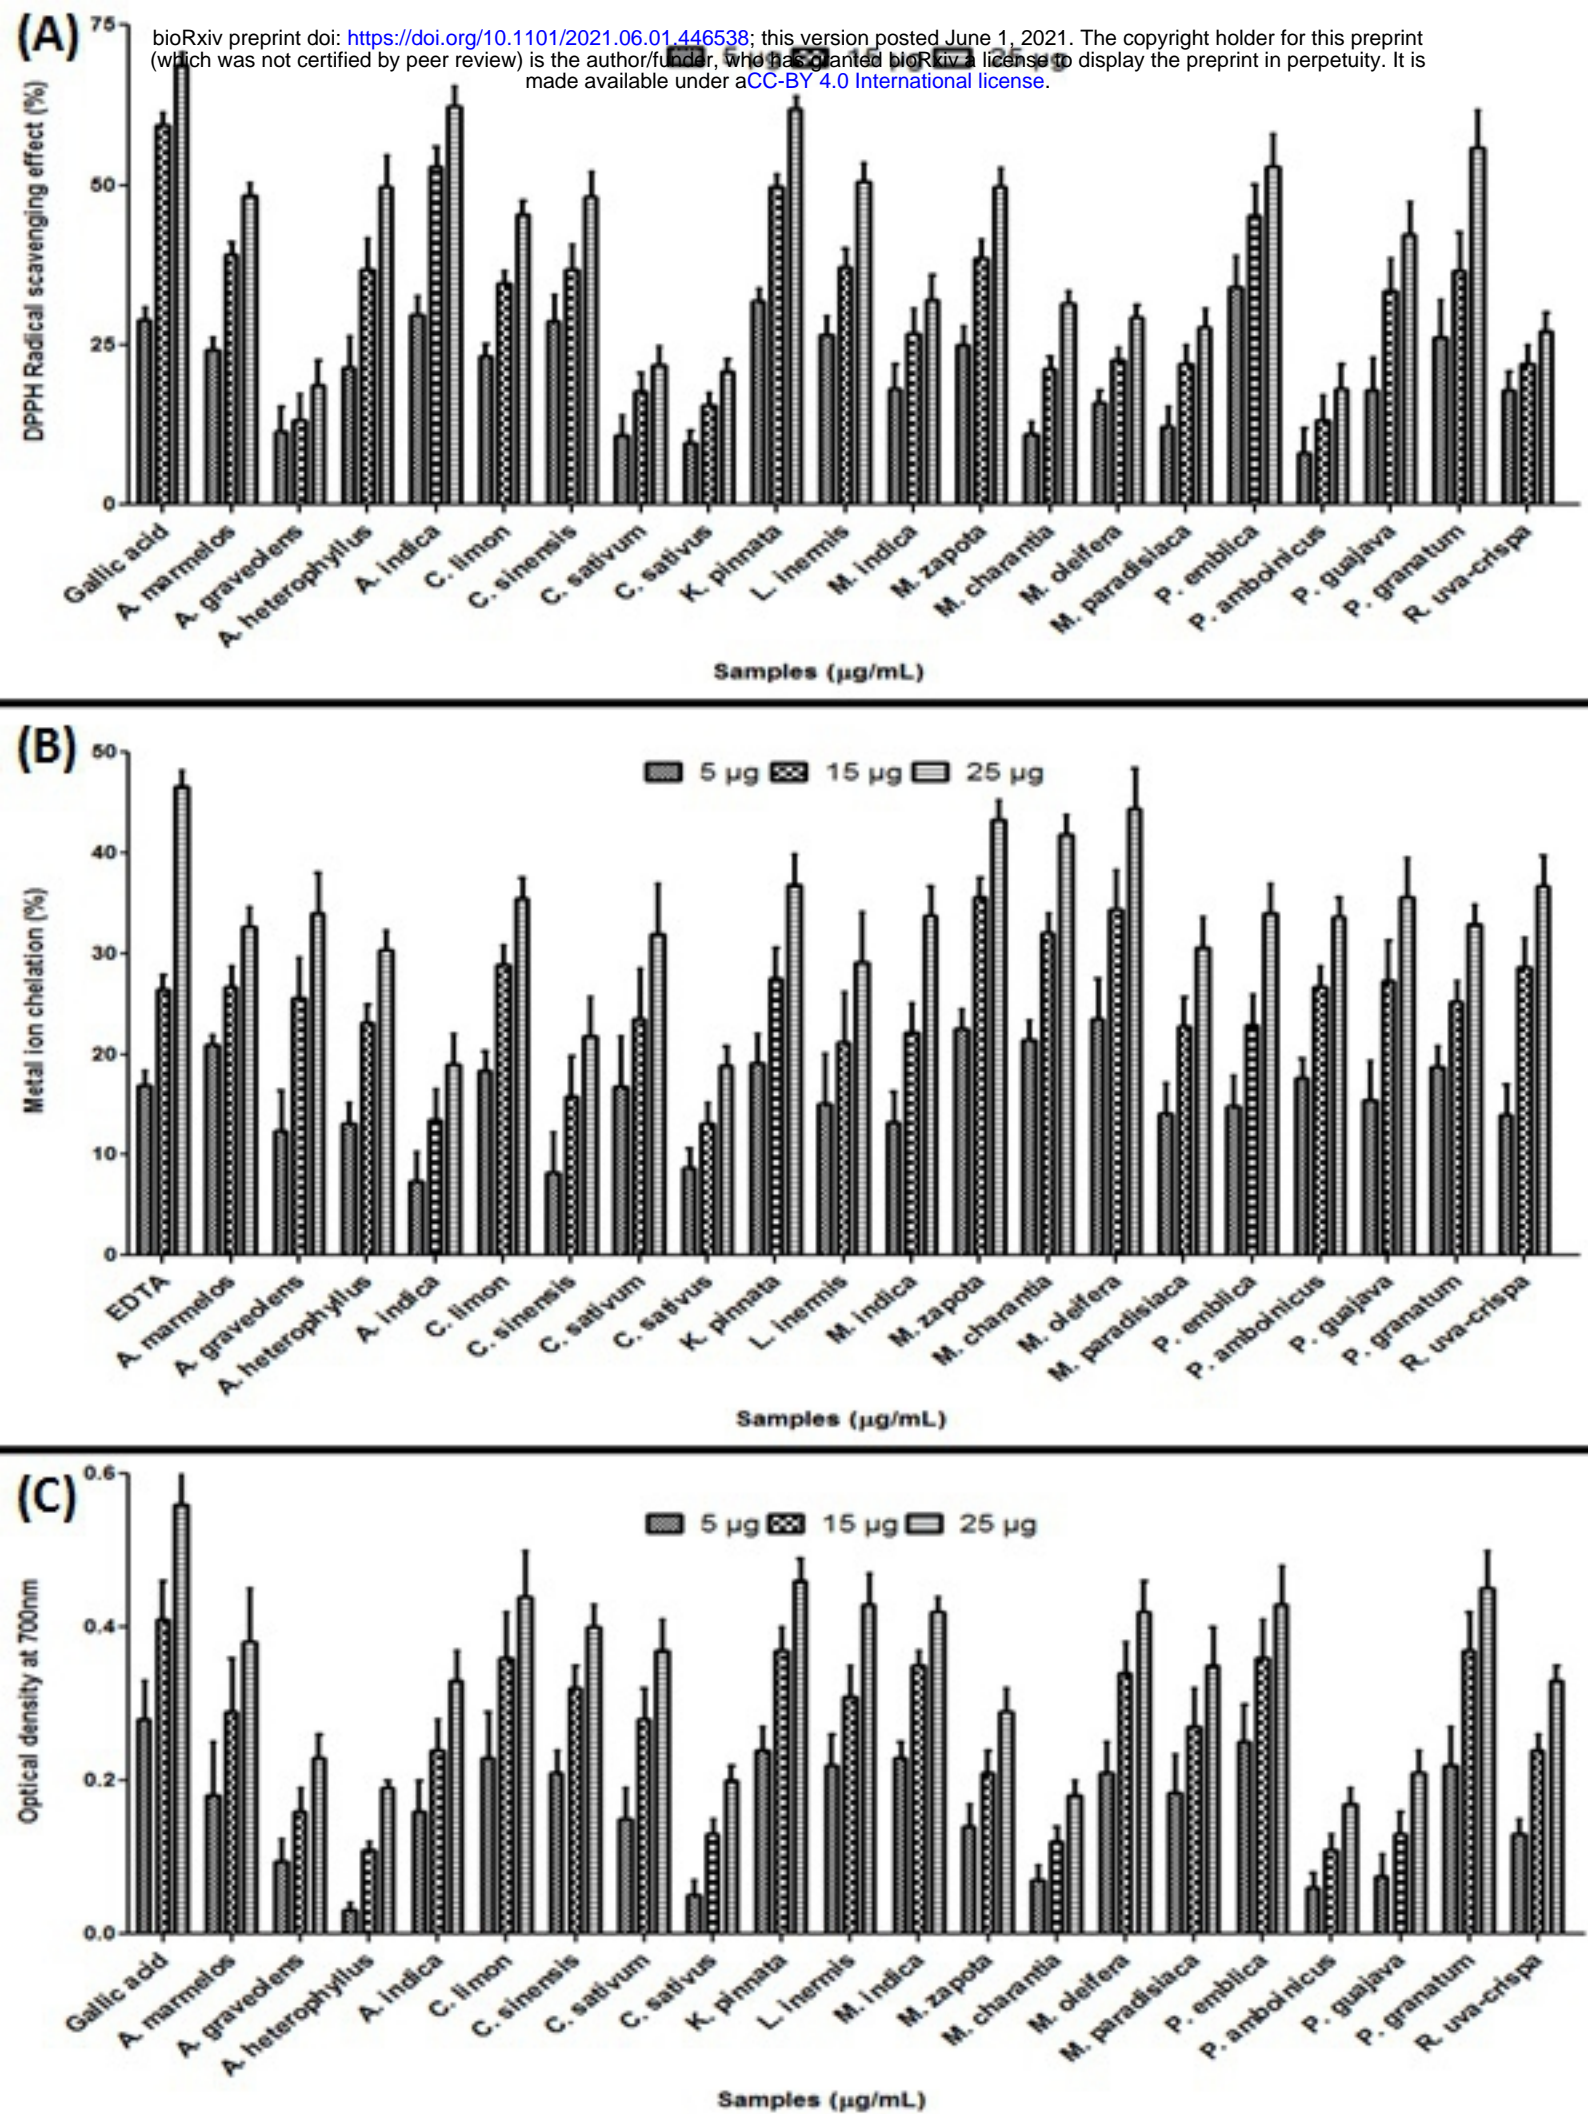

Figure 2



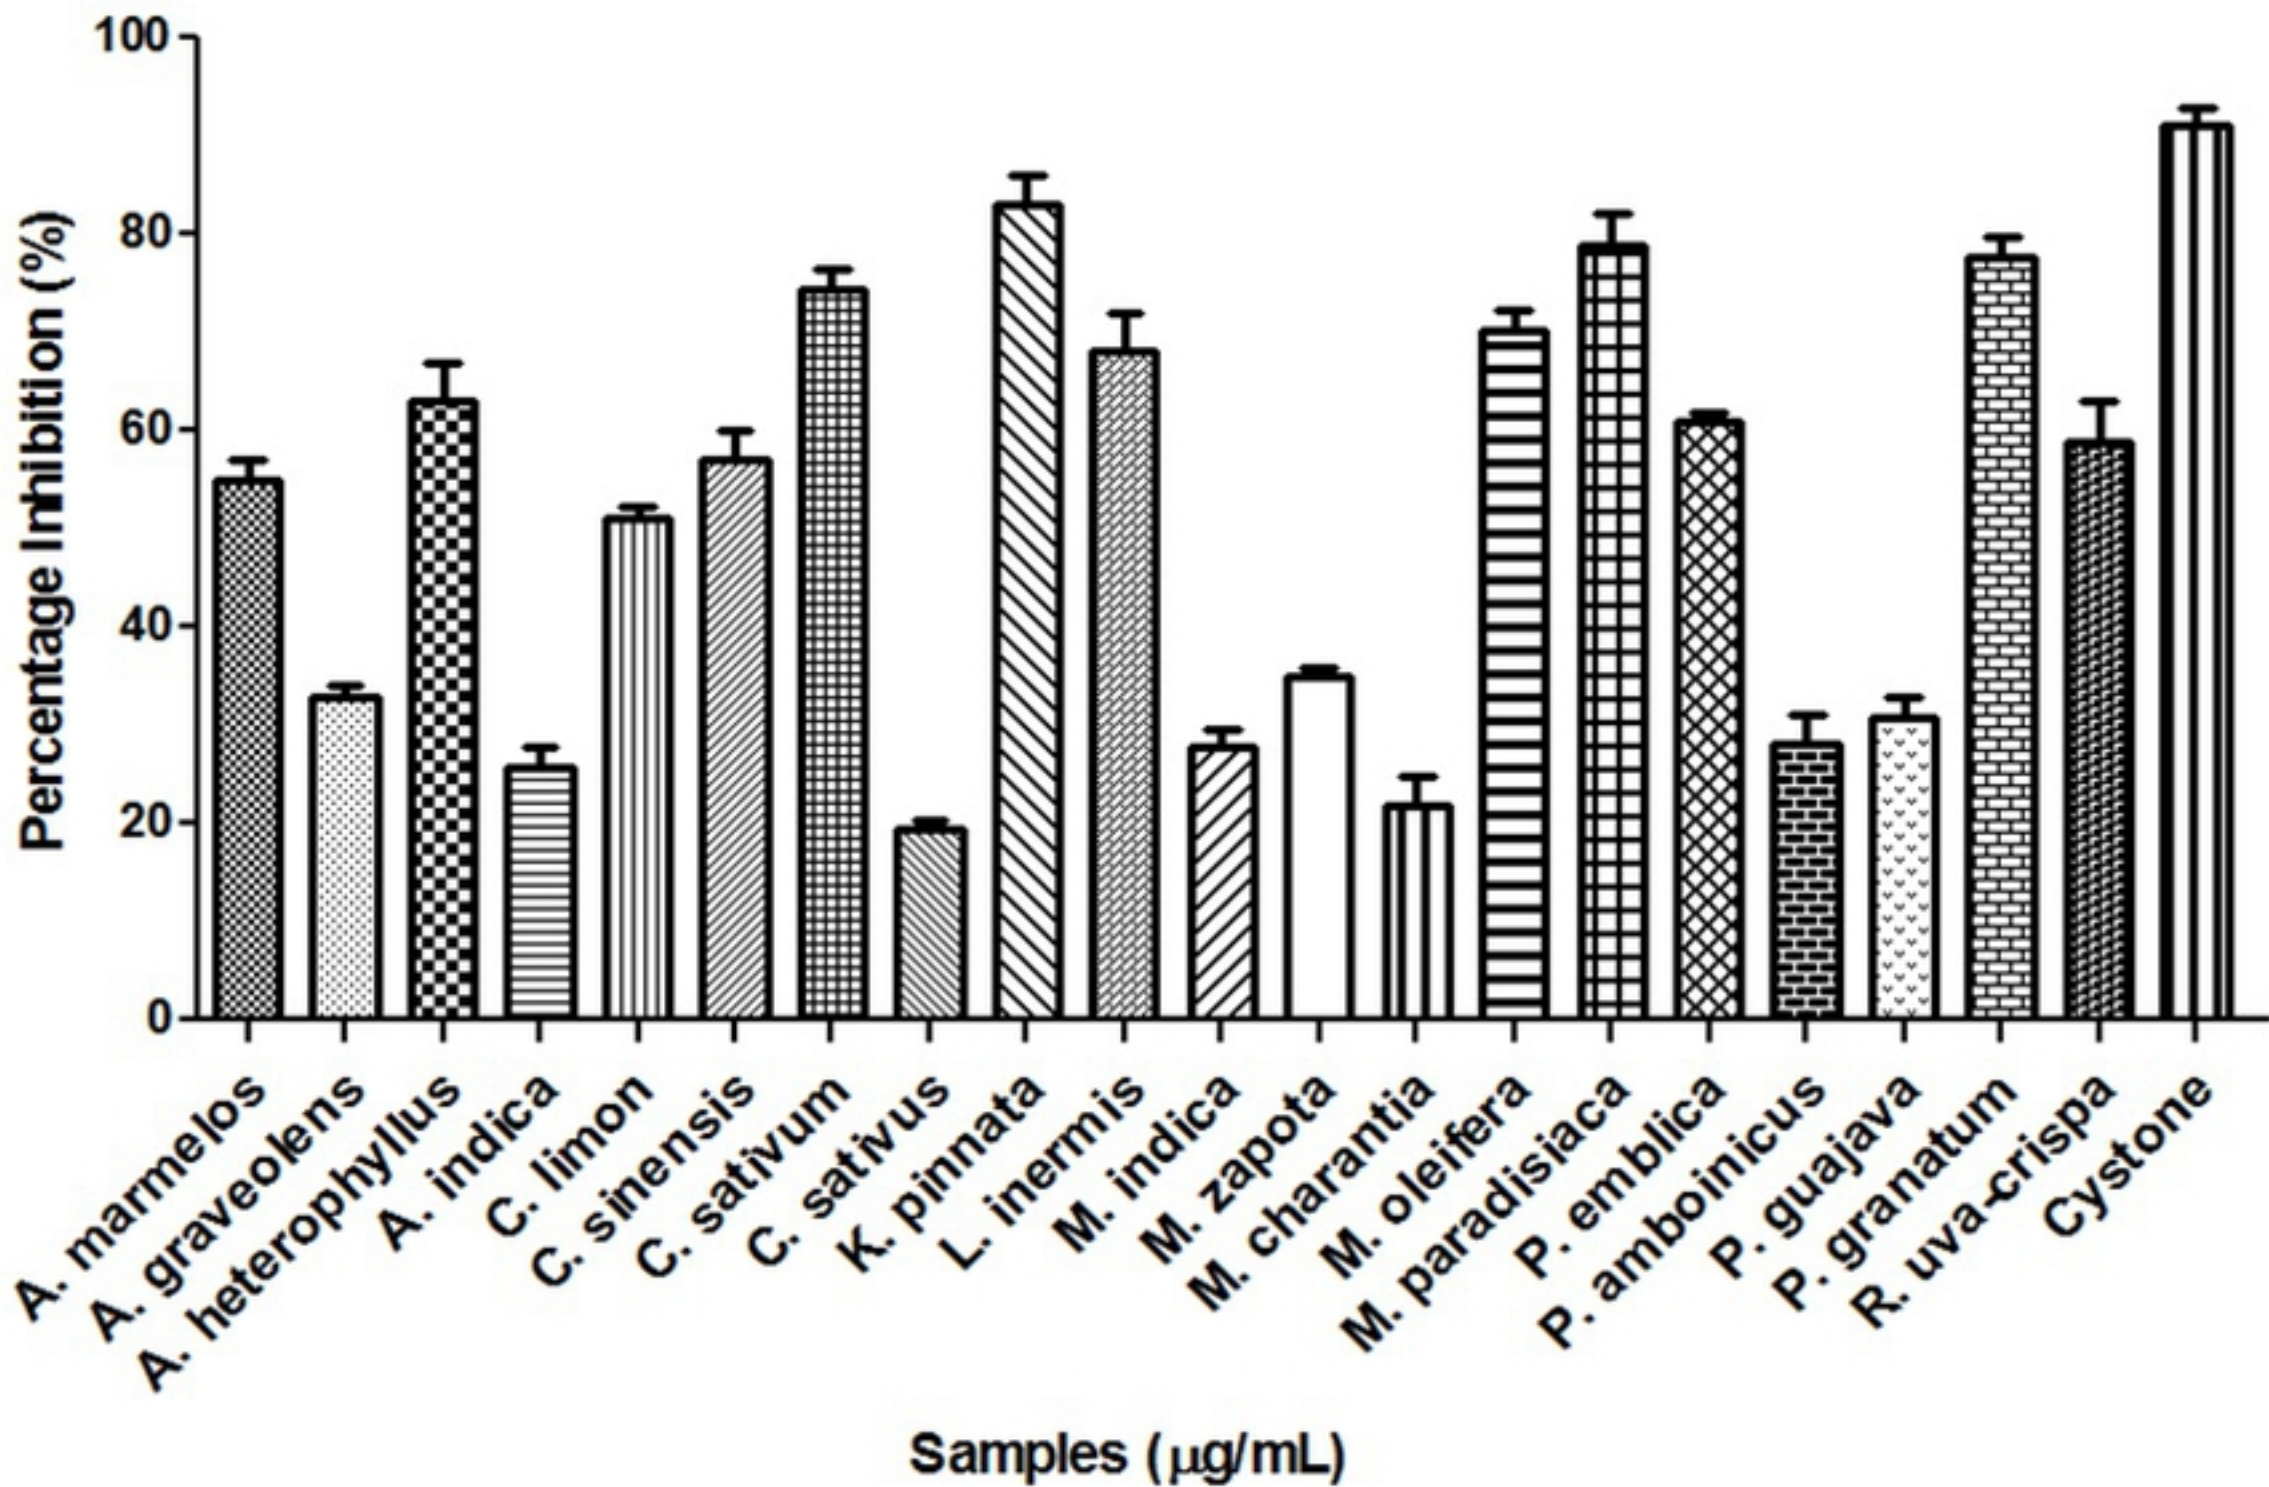

Figure 3

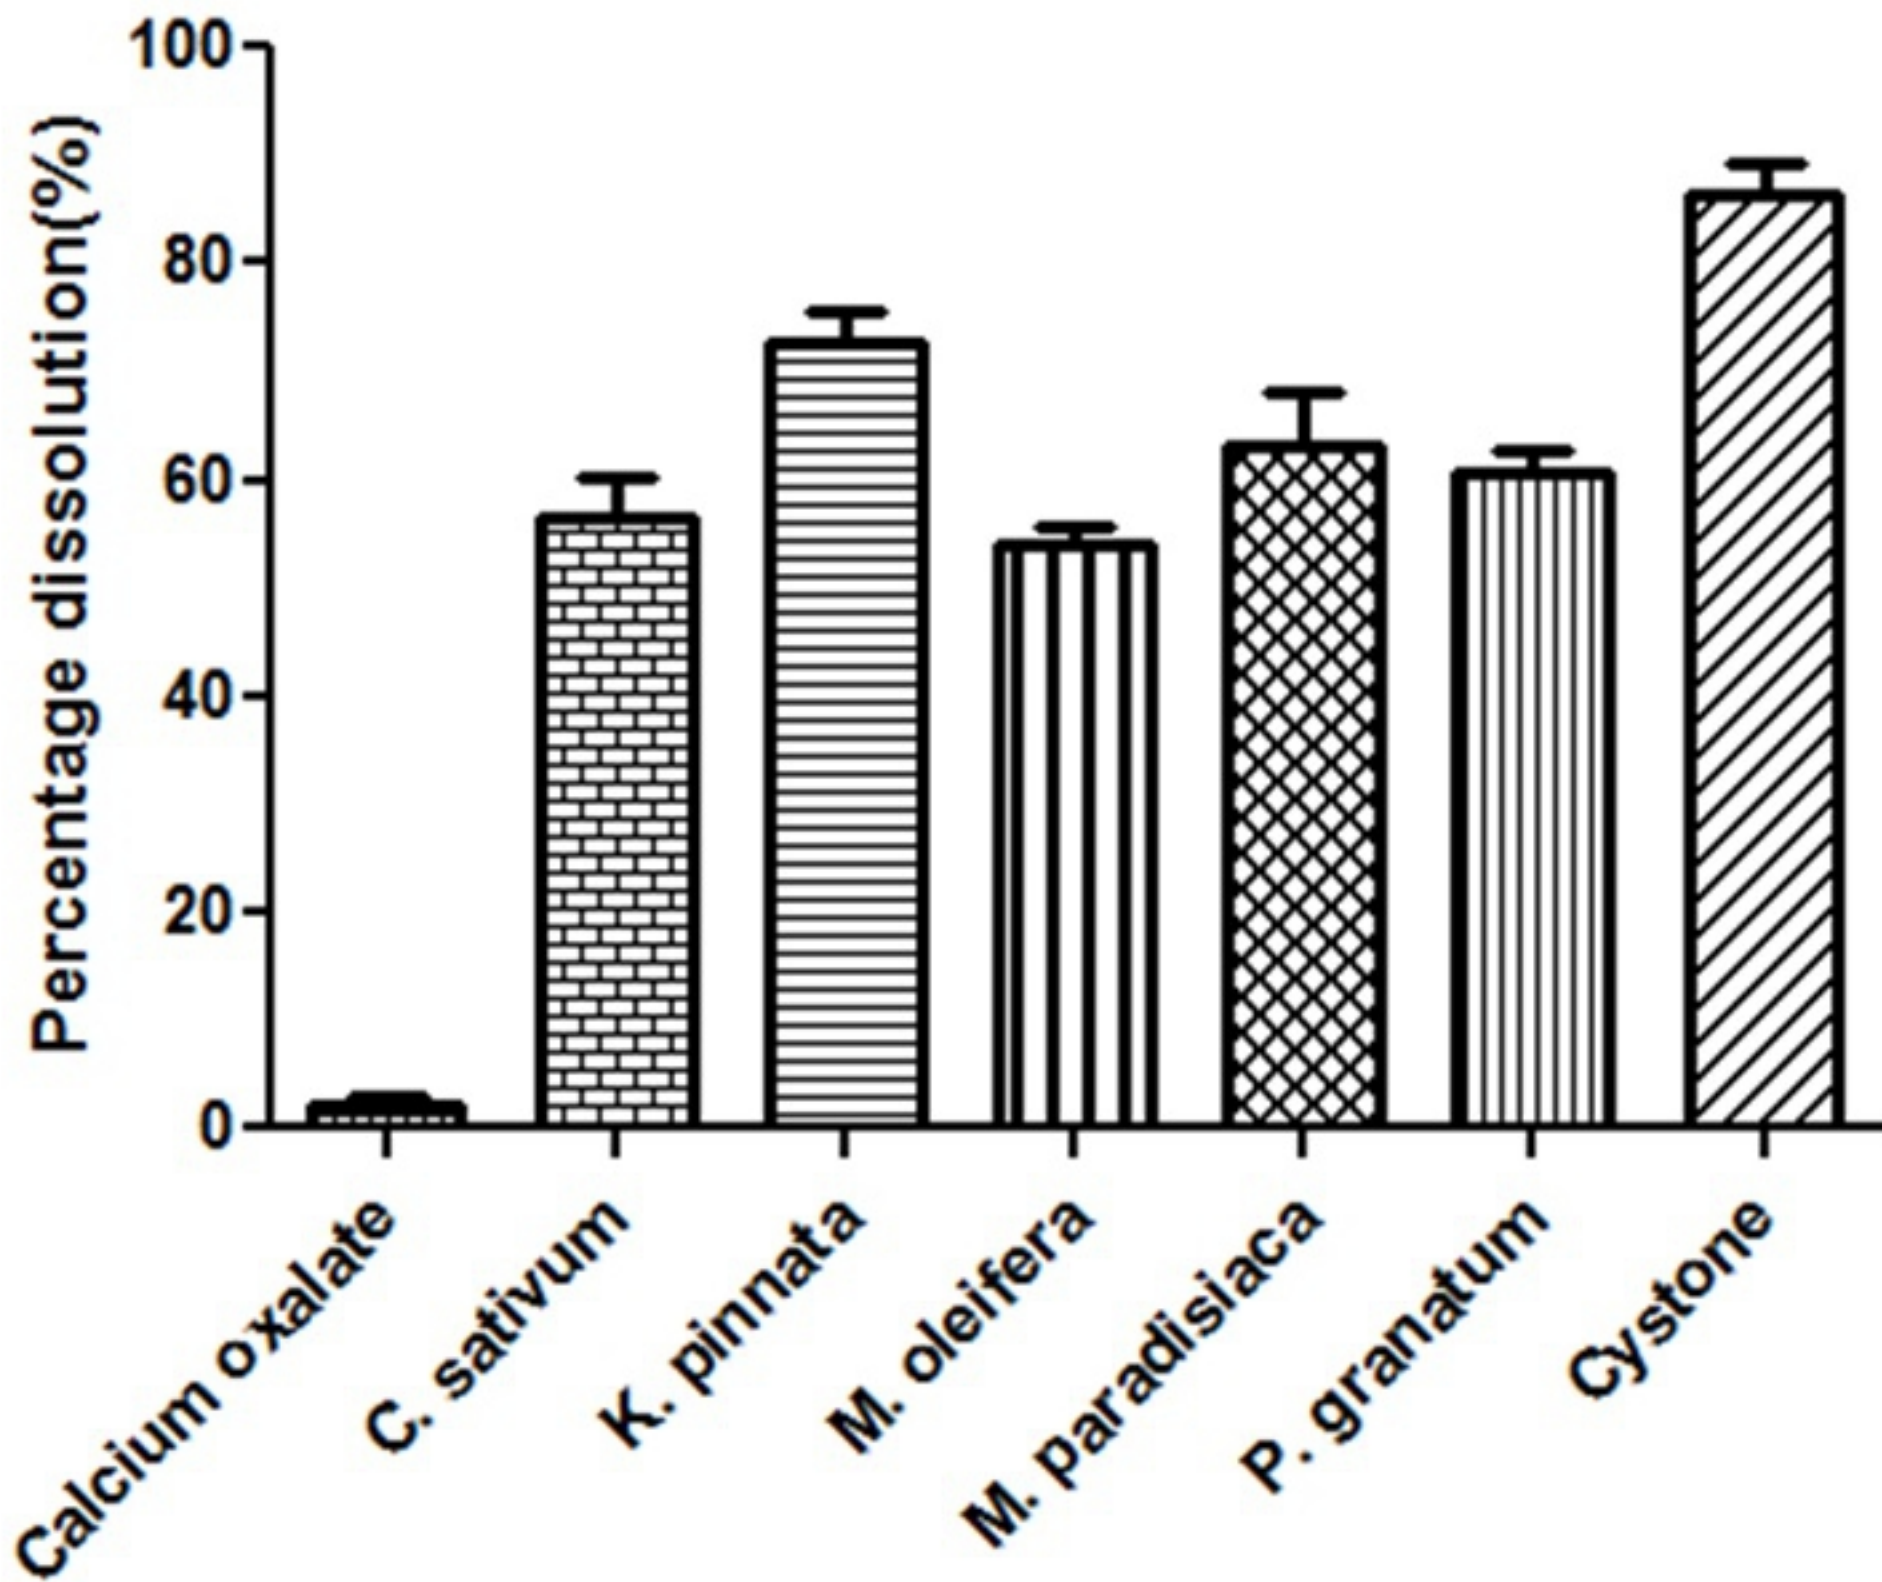

Figure 4



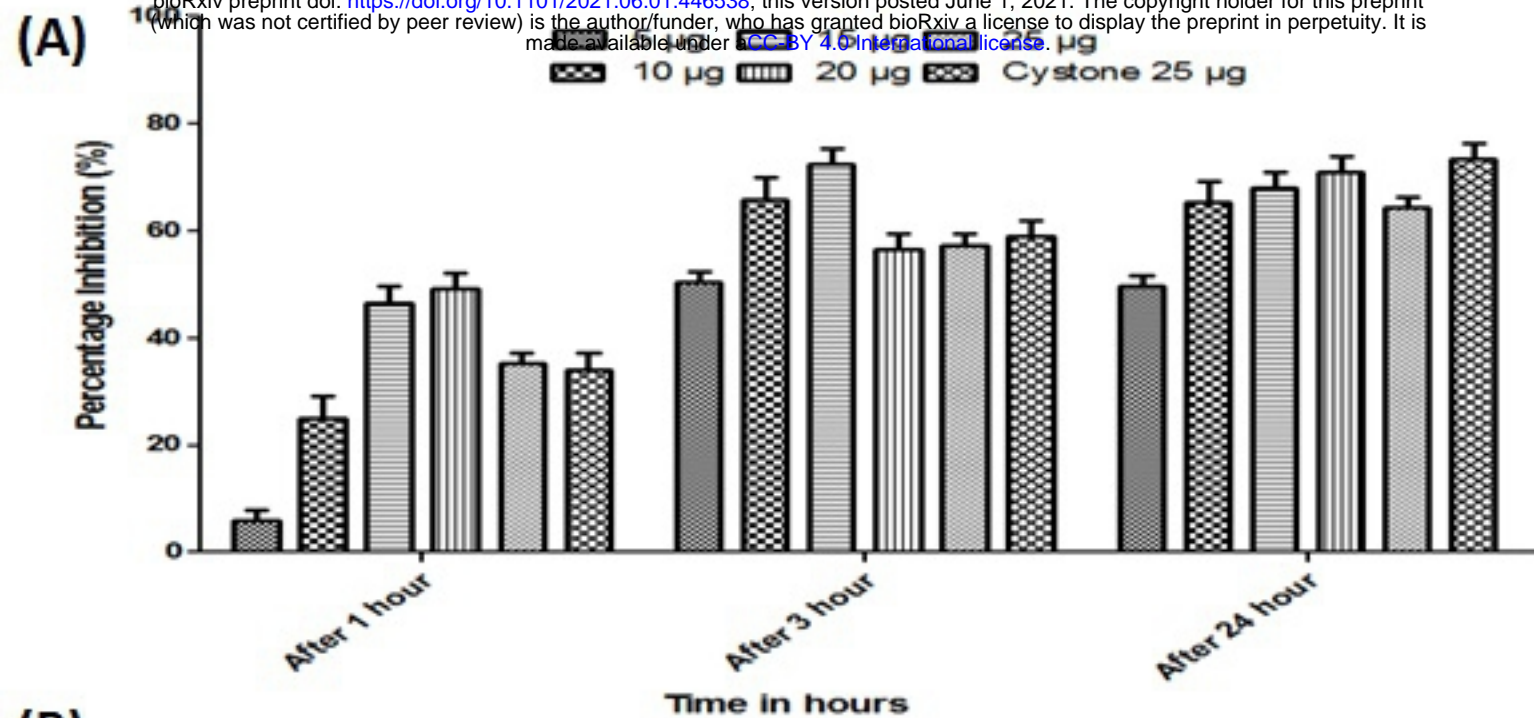

**(B)**

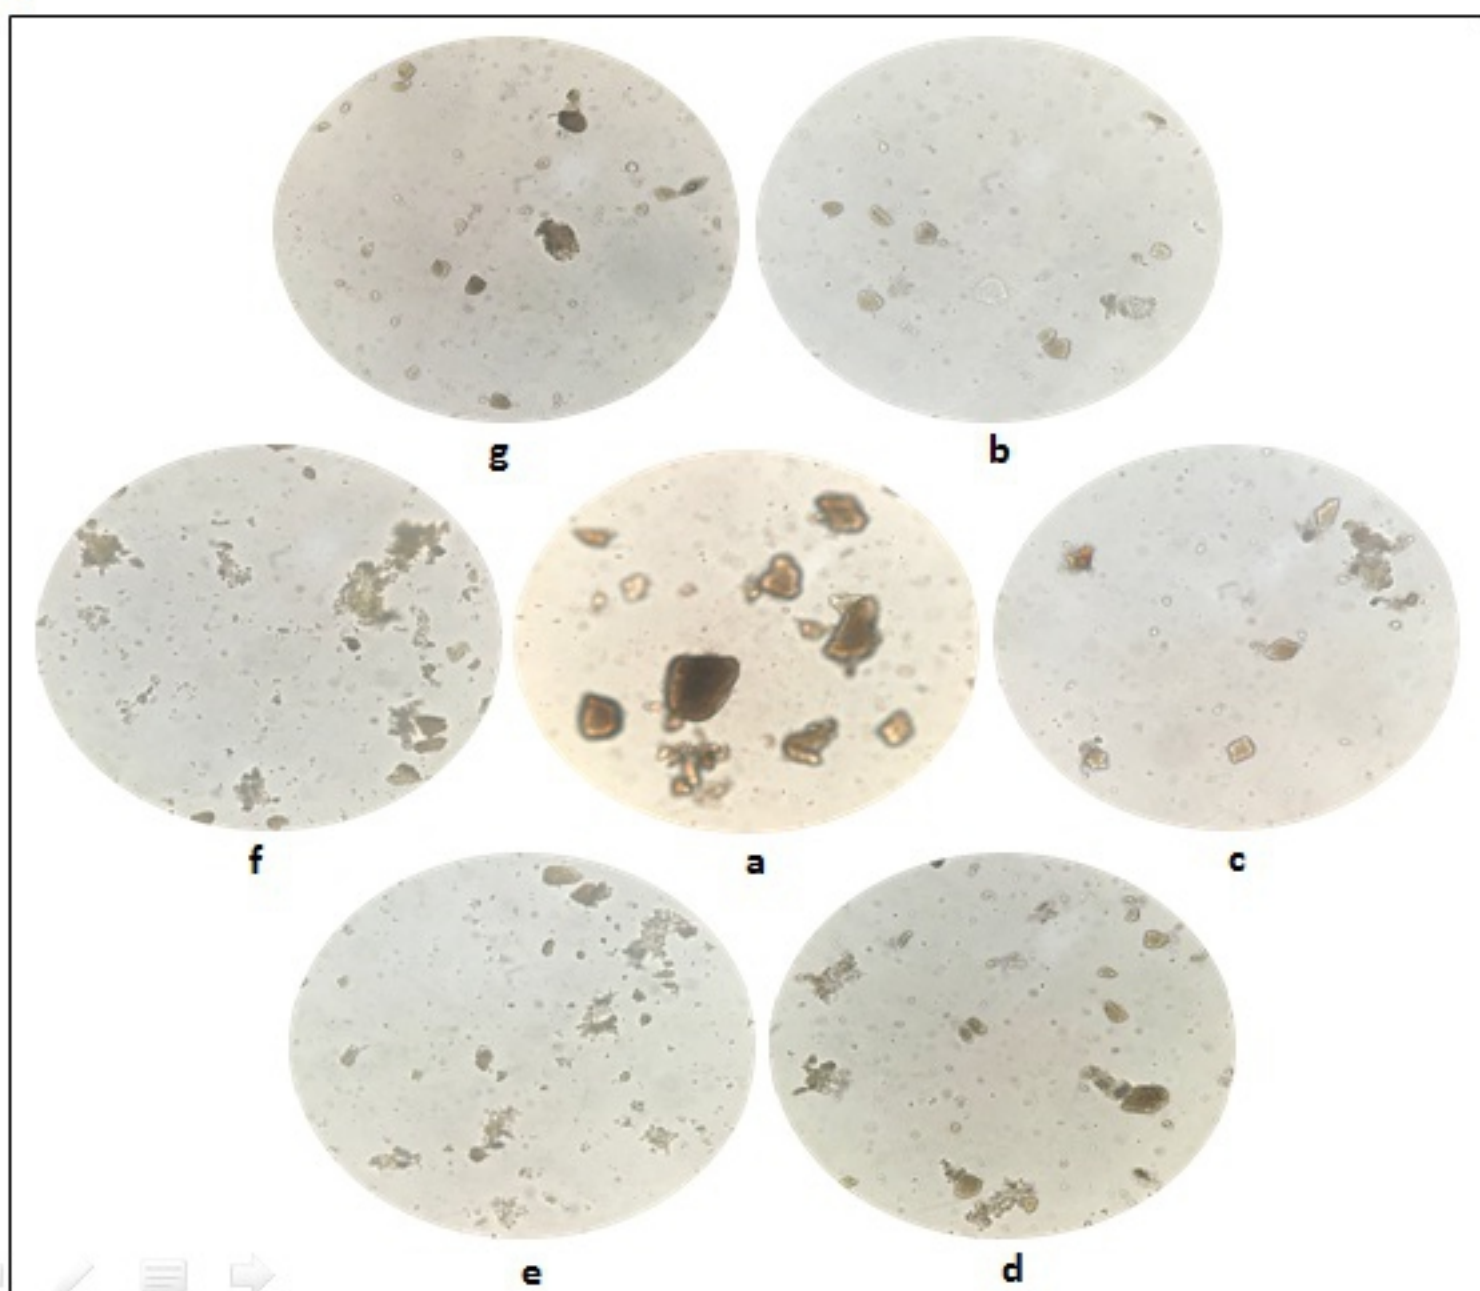

Figure 5

## Panel A

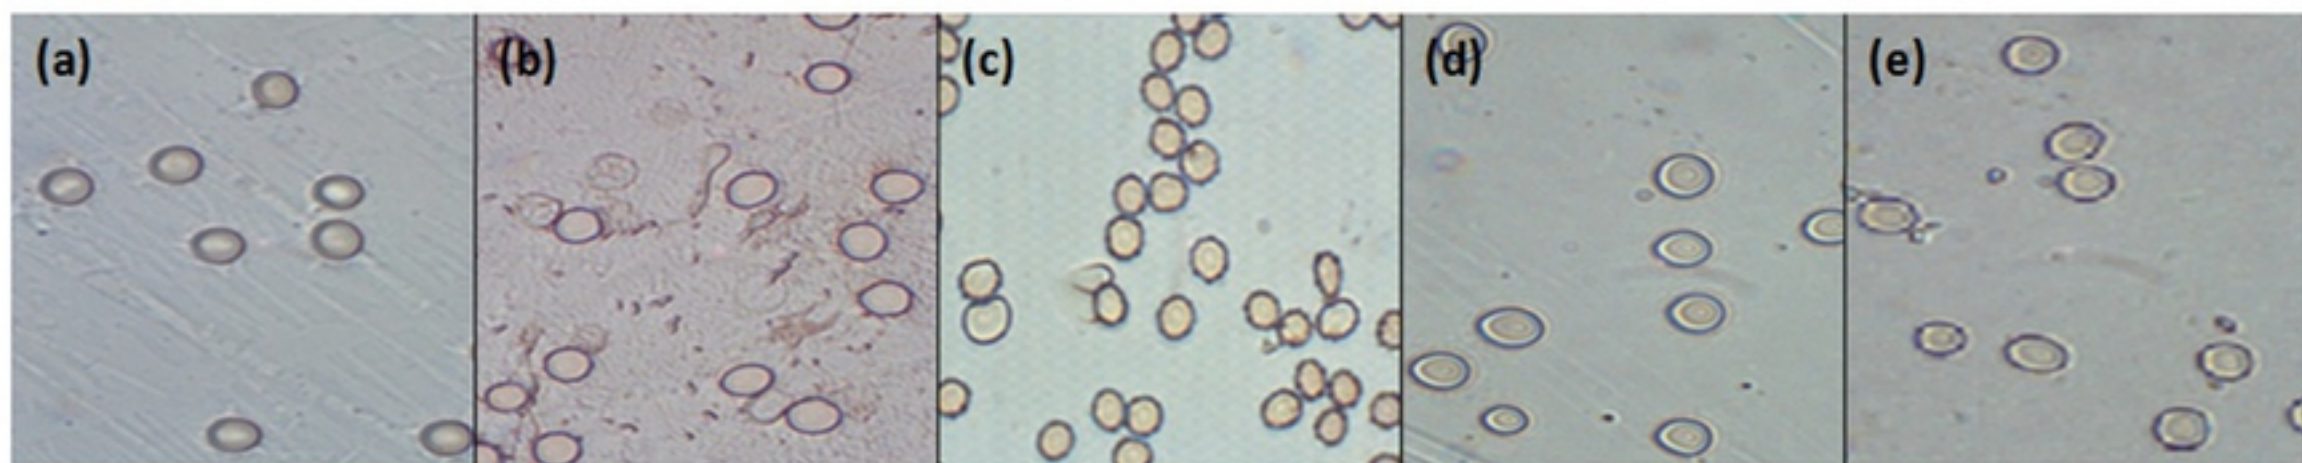

## Panel B

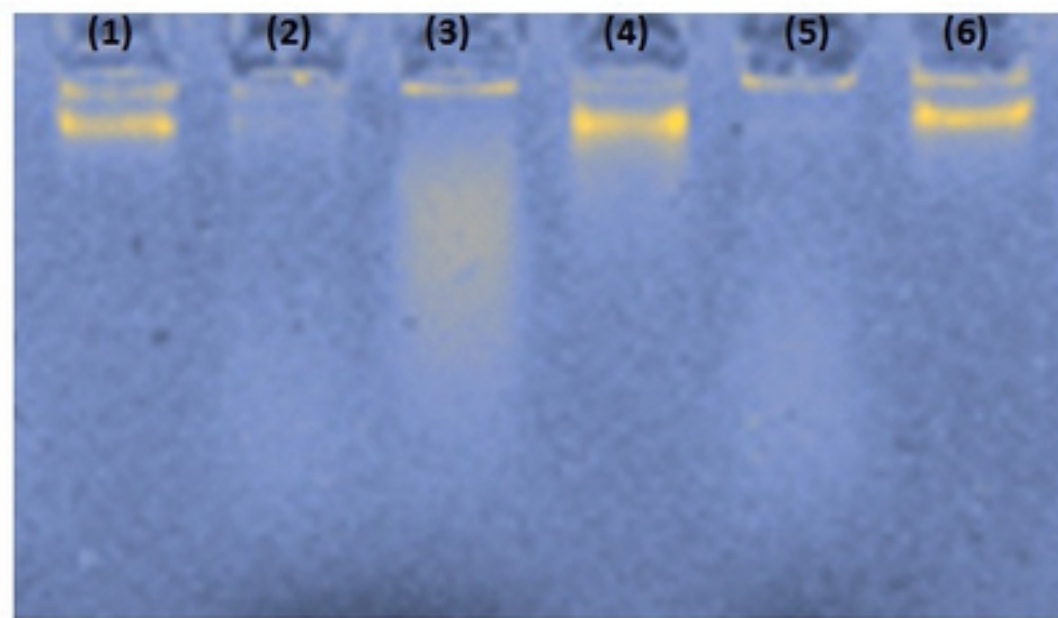

Figure 7





| Sl No | BOTANICAL NAME                  | COMMON NAME               | FAMILY                 | BIOLOGICAL ACTIVITY                                                                                                                                                                                                                                                                                                                                                                       | REFERENCES                                                           |
|-------|---------------------------------|---------------------------|------------------------|-------------------------------------------------------------------------------------------------------------------------------------------------------------------------------------------------------------------------------------------------------------------------------------------------------------------------------------------------------------------------------------------|----------------------------------------------------------------------|
| 1     | <i>Aegle marmelos</i>           | Bael                      | <i>Rutaceae</i>        | Antioxidant and anti-inflammatory properties                                                                                                                                                                                                                                                                                                                                              | Pynam & Dharmesh (2018)                                              |
| 2     | <i>Apium graveolens</i>         | Celery                    | <i>Apiaceae</i>        | Antioxidant, neurochemical activity and also used in treatments for hypertension, gout, and diabetes                                                                                                                                                                                                                                                                                      | Chonpathompikunlert <i>et al.</i> , (2018)                           |
| 3     | <i>Artocarpus heterophyllus</i> | Jackfruit                 | <i>Moraceae</i>        | Anticarcinogenic, antimicrobial, antifungal, anti-inflammatory, wound healing, and hypoglycemic effects                                                                                                                                                                                                                                                                                   | Ranasinghe <i>et al.</i> , (2019)                                    |
| 4     | <i>Azadirachta indica</i>       | Neem                      | <i>Meliaceae</i>       | Hypolipidemic, antifertility, microbicidal, antidiabetic, anti-inflammatory, hepatoprotective, antipyretic, hypoglycemic, insecticidal, nematicidal, antiulcer, antioxidant, neuroprotective, cardioprotective, and antileishmaniasis properties.                                                                                                                                         | Saleem <i>et al.</i> , (2018)                                        |
| 5     | <i>Citrus limon</i>             | Lemon                     | <i>Rutaceae</i>        | Antiuro lithiatic activity                                                                                                                                                                                                                                                                                                                                                                | Prabhu <i>et al.</i> , (2016)                                        |
| 6     | <i>Citrus sinensis</i>          | Orange                    | <i>Rutaceae</i>        | Antioxidant, Antiuro lithiatic activity                                                                                                                                                                                                                                                                                                                                                   | Ungjaroenwathana <i>et al.</i> , (2019)                              |
| 7     | <i>Coriandrum sativum</i>       | Coriander                 | <i>Apiaceae</i>        | Antimicrobial, antioxidant, hypoglycemic, hypolipidemic, anxiolytic, analgesic, anti-inflammatory, anti-convulsant and anticancer activities                                                                                                                                                                                                                                              | Laribi <i>et al.</i> , (2015)                                        |
| 8     | <i>Cucumis sativus</i>          | Cucumber                  | <i>Cucurbitaceae</i>   | Anti-inflammatory, antioxidant activity                                                                                                                                                                                                                                                                                                                                                   | Trejo-Moreno <i>et al.</i> , (2018)                                  |
| 9     | <i>Kalanchoe pinnata</i>        | Life plant                | <i>Crasulaceae</i>     | Antimicrobial activity, antinociceptive, antiedematogenic, and anti-inflammatory                                                                                                                                                                                                                                                                                                          | Sohgaura <i>et al.</i> , (2018)<br>Ferreira <i>et al.</i> , (2014)   |
| 10    | <i>Lawsonia inermis</i>         | Henna                     | <i>Lythraceae</i>      | Antibacterial, antifungal, antioxidant, antiproliferative, cytotoxicity                                                                                                                                                                                                                                                                                                                   | Elansary <i>et al.</i> , (2020)                                      |
| 11    | <i>Mangifera indica</i>         | Mango                     | <i>Anacardiaceae</i>   | Antioxidant, anti-inflammatory, radioprotective, antitumor, immunomodulatory, antiallergic, antidiabetic, anti-bone resorption, monoamine oxidase inhibiting, antiviral, antifungal, antibacterial, antispasmodic, antidiarrheal, antimalarial, antiparasitic lipolytic properties.                                                                                                       | Batool <i>et al.</i> , (2018)                                        |
| 12    | <i>Manilkara zapota</i>         | Chiku                     | <i>Sapotaceae</i>      | Antibacterial, hepato-protective, anti-inflammatory, anti-tussive, antifungal, anti-tumour, and free radical scavenging potential                                                                                                                                                                                                                                                         | Sharma <i>et al.</i> , (2020)                                        |
| 13    | <i>Momordica charantia</i>      | Bitter gourd              | <i>Cucurbitaceae</i>   | Antihyperglycemic, antibacterial, antiviral, antitumor, immunomodulation, antioxidant, antidiabetic, anthelmintic, antimutagenic, antiulcer, antilipolytic, antifertility, hepatoprotective, anticancer and anti-inflammatory activities                                                                                                                                                  | Jia <i>et al.</i> , (2017)                                           |
| 14    | <i>Moringa oleifera</i>         | Drumsticks                | <i>Moringaceae</i>     | Antiuro lithiatic activity, analgesic, anti-inflammatory, antipyretic, anticancer, antioxidant, nootropic, hepatoprotective, astroprotective, antiulcer, cardiovascular, antiobesity, antiepileptic, antiasthmatic, antidiabetic, antiuro lithiatic, diuretic, local anesthetic, antiallergic, anthelmintic, wound healing, antimicrobial, immunomodulatory, and antidiarrheal properties | Karadi <i>et al.</i> , (2006)<br>Bhattacharya <i>et al.</i> , (2018) |
| 15    | <i>Musa paradisiaca</i>         | banana                    | <i>Musaceae</i>        | Antiuro lithiatic, antioxidant activity                                                                                                                                                                                                                                                                                                                                                   | Panigrahi PN <i>et al.</i> , (2017)                                  |
| 16    | <i>Phyllanthus emblica</i>      | Indian gooseberry or amla | <i>Euphorbiaceae</i>   | Antidiabetic, hypolipidemic, antibacterial, antioxidant, antiulcerogenic, hepatoprotective, gastroprotective, and chemopreventive properties. In treatment of diarrhea, jaundice, and inflammation.                                                                                                                                                                                       | Krishnaveni & Mirunalini (2010)<br>Li <i>et al.</i> , (2020)         |
| 17    | <i>Plectranthus amboinicus</i>  | Country Borage            | <i>Lamiaceae</i>       | Antimicrobial, anti inflammatory, antitumor, wound healing, anti-epileptic, larvicidal, antioxidant and analgesic activities. Effective against respiratory, cardiovascular, oral, skin, digestive and urinary diseases                                                                                                                                                                   | Arumugam <i>et al.</i> , (2016)                                      |
| 18    | <i>Psidium guajava</i>          | Guava                     | <i>Myrtaceae</i>       | Antiuro lithiatic activity, antioxidant, anti inflammatory activity                                                                                                                                                                                                                                                                                                                       | Agarwal & Varma (2015)<br>Vasconcelos <i>et al.</i> , (2017)         |
| 19    | <i>Punica granatum</i>          | Pomegranate               | <i>Lythraceae</i>      | Antiuro lithiatic activity, anti-inflammatory, antibacterial, antidiarrheal, immune modulatory, antitumor, wound healing and antifungal                                                                                                                                                                                                                                                   | Rathod <i>et al.</i> , (2012)<br>Saeed <i>et al.</i> , (2018)        |
| 20    | <i>Ribes Uva-crispa</i>         | Gooseberry                | <i>Grossulariaceae</i> | Antioxidant activity                                                                                                                                                                                                                                                                                                                                                                      | Laczkó-Zöld <i>et al.</i> , (2018)                                   |

Table 1



Table 2

| Name of the Antioxidant enzymes (Targets) | Name of the molecules (Ligands)   | Details of H-bond interaction |                                |                              | Atomic Contact Energy (ACE) values in KJ/mol | Gliding values | Amino acid residues of docked domains                                                                                                          |
|-------------------------------------------|-----------------------------------|-------------------------------|--------------------------------|------------------------------|----------------------------------------------|----------------|------------------------------------------------------------------------------------------------------------------------------------------------|
|                                           |                                   | No. of bond                   | Bond energy                    | Bond length                  |                                              |                |                                                                                                                                                |
| Superoxide dismutase                      | Gallic acid                       | 2                             | -2.35                          | 3.12                         | -137.22                                      | -2.74          | Leu 106, Ile 151, Cys 111, Ile 113                                                                                                             |
|                                           | Vanillic acid                     | 4                             | -2.5                           | 2.60                         | -156.44                                      | -3.12          | Ala 1, Leu 106, Cys 111, Ile 113, Cys 111, Ile 113                                                                                             |
|                                           | Rutin                             | 10                            | -2.36                          | 2.60                         | -349.88                                      | <b>-6.99</b>   | Leu 106, Ser 107, Gly 108, Cys 111, Ile 113, Arg 115, Ile 151, Leu 106, Ser 107, Gly 108, Asp 109, Cys 111, Ile 113, Arg 115, Ile 151          |
|                                           | Potassium Magnesium Citrate (STD) | 4                             | -2.5                           | 2.65                         | -222.84                                      | <b>-4.45</b>   | Val 148, Val 7, Lys 9, Gly 147, Val 148                                                                                                        |
| Peroxidase                                | Gallic acid                       | 1                             | -2.5                           | 2.90                         | <b>-89.50</b>                                | -1.79          | Met 127, Thr 152, Leu 190, Thr 192                                                                                                             |
|                                           | Vanillic acid                     | 1                             | -                              | -                            | -116.04                                      | -2.32          | Phe 28, Ala 58, Ala 62, Lys 67, Pro 99, Phe 100, Pro 101                                                                                       |
|                                           | Rutin                             | 8                             | -2.04<br>-2.5<br>-2.5          | 3.19<br>2.63<br>2.68         | -243.50                                      | <b>-4.87</b>   | Arg 174, Leu 190, Thr 192, Met 127, Val 129, Pro 150, Ala 151, Thr 152                                                                         |
|                                           | Potassium Magnesium Citrate (STD) | 4                             | -2.5                           | 3.05                         | -184.76                                      | <b>-3.69</b>   | Glu 93, Pro 94, Thr 95, Glu 96, Lys 97                                                                                                         |
| Catalase                                  | Gallic acid                       | 9                             | -2.05<br>-2.26<br>-2.5         | 3.18<br>3.14<br>2.88         | -53.17                                       | -1.06          | Gln 52, Tyr 230, Pro 344, Ser 345, Pro 346, Gln 351, Thr 422, Phe 424, Val 428                                                                 |
|                                           | Vanillic acid                     | 5                             | -2.06<br>-2.5                  | 2.54<br>2.87                 | -53.80                                       | -1.07          | Pro 358, Arg 362, Leu 370, Thr 28, Gly 30, Asn 32, Val 54                                                                                      |
|                                           | Rutin                             | 8                             | -2.5<br>-2.5<br>-2.27<br>-2.43 | 2.82<br>2.63<br>3.14<br>2.79 | -217.45                                      | <b>-4.34</b>   | His 363, Pro 390, Arg 362, His 363, Leu 365, Pro 367, His 363, Arg 364, Pro 390                                                                |
|                                           | Potassium Magnesium Citrate (STD) | 2                             | -1.98                          | 3.20                         | -78.17                                       | <b>-1.56</b>   | Glu 66, Arg 67, Arg 169, His 174                                                                                                               |
| Glutathione S-transferase                 | Gallic acid                       | -                             | -                              | -                            | -165.42                                      | -3.30          | Leu 35, Val 36, His 40                                                                                                                         |
|                                           | Vanillic acid                     | -                             | -                              | -                            | -176.76                                      | -3.53          | Val 36, Leu 119                                                                                                                                |
|                                           | Rutin                             | 12                            | -2.40<br>-2.5<br>-2.5          | 3.11<br>2.91<br>3.07         | -196.14                                      | <b>-3.92</b>   | Ala 103, Asp 104, Arg 107, Gly 108, Arg 239, Arg 242, Pro 244, Ala 103, Asp 104, Cys 105, Arg 107, Gly 108, Thr 109, Asn 135, Arg 242, Pro 244 |
|                                           | Potassium Magnesium Citrate (STD) | 2                             | -                              | -                            | -251.96                                      | <b>-5.03</b>   | Thr 109, Ile 112, Asn 135, Ala 138, Pro 244                                                                                                    |

bioRxiv preprint doi: <https://doi.org/10.1101/2021.06.01.446538>; this version posted June 1, 2021. The copyright holder for this preprint (which was not certified by peer review) is the author/funder, who has granted bioRxiv a license to display the preprint in perpetuity. It is made available under aCC-BY 4.0 International license.



Table 3:

| Name of the Metabolic enzymes (Targets) | Name of the molecules (Ligands)   | Details of H-bond interaction |                                |                              | Atomic Contact Energy (ACE) values KJ/mol | Gliding Values | Amino acid residues of docked domains                                                                  |
|-----------------------------------------|-----------------------------------|-------------------------------|--------------------------------|------------------------------|-------------------------------------------|----------------|--------------------------------------------------------------------------------------------------------|
|                                         |                                   | No. of bond                   | Bond energy                    | Bond length                  |                                           |                |                                                                                                        |
| Alanine-Glyoxylate Aminotransferase     | Gallic acid                       | 5                             | -2.5<br>-2.5<br>-2.5<br>-2.5   | 2.87<br>3.08<br>2.68<br>2.76 | -110.58                                   | -2.21          | Ala 210, Leu 211, Ser 275, Gln 282, Ser 287                                                            |
|                                         | Vanillic acid                     | 2                             | -2.5<br>-2.5                   | 2.99<br>2.68                 | -134.52                                   | -2.69          | Ala 210, Leu 211, Asn 212, Leu 278, Gln 282, Ser 287, His 291                                          |
|                                         | Rutin                             | 3                             | -2.25<br>-2.10                 | 3.14<br>3.17                 | -302.13                                   | -6.04          | Ile 20, Pro 21, Asn 22, Gln 23, Leu 24, Leu 25, Asn 32, Leu 33, Met 38                                 |
|                                         | Potassium Magnesium Citrate (STD) | 1                             | -                              | -                            | -202.38                                   | -4.04          | Leu 163, Thr 191, Arg 292, Pro 314, Ala 315, Arg 317, Pro 319                                          |
| Oxalyl-Coa decarboxylase                | Gallic acid                       | 5                             | -2.5<br>-2.5<br>-2.5<br>-2.09  | 2.86<br>2.96<br>2.70<br>2.78 | -121.82                                   | -2.43          | Ala 92, Thr 95, Thr 96, Pro 131, His 132, Trp 425, Glu 122, Met 123                                    |
|                                         | Vanillic acid                     | 4                             | -2.34                          | 2.81                         | -130.17                                   | -2.60          | Ala 92, Thr 96, Pro 131, His 132, Trp 425, Glu 122, Met 123, Val 128                                   |
|                                         | Rutin                             | 8                             | -2.39<br>-2.06                 | 3.12<br>3.18                 | -211.63                                   | -4.23          | Thr 95, Pro 131, His 132, Cys 133, Arg 160, Arg 282, Val 113, Gln 116, Gly 118, Met 123, Asp 124       |
|                                         | Potassium Magnesium Citrate (STD) | 3                             | -2.05                          | 3.18                         | -154.10                                   | -3.08          | Pro 246, Lys 251, Ala 263, Arg 408, Met 409                                                            |
| D-glycerate dehydrogenase               | Gallic acid                       | 7                             | -2.35<br>-2.5<br>-2.5<br>-2.09 | 2.58<br>3.08<br>3.04<br>2.55 | -83.16                                    | -1.66          | Thr 105, Thr 238, Ala 239, Val 265, His 287, Ser 290, Trp 135                                          |
|                                         | Vanillic acid                     | 3                             | -2.20                          | 2.56                         | -90.91                                    | -1.81          | Trp 135, Ile 77, Val 101, Thr 105, Thr 238, His 287, Ser 290                                           |
|                                         | Rutin                             | 7                             | -2.45<br>-2.17                 | 3.10<br>3.16                 | -261                                      | -5.22          | Ile 77, Pro 98, Val 101, Thr 102, Thr 105, Ile 158, Asn 210, Thr 238, Ala 239, Arg 240                 |
|                                         | Potassium Magnesium Citrate (STD) | 5                             | -2.5<br>-2.5                   | 2.90<br>2.78                 | -105.07                                   | -2.10          | Pro 133, Gly 134, Trp 135, Glu 136, Trp 9, Lys 33, Asn 54, Pro 270                                     |
| Lactate dehydrogenase                   | Gallic acid                       | 3                             | -2.02                          | 3.19                         | -43.36                                    | -0.86          | Arg 98, Gln 99, Arg 105, His 192, Ala 237, Ile 251                                                     |
|                                         | Vanillic acid                     | 2                             | -                              | -                            | -61.57                                    | -1.23          | Asn 20, Leu 43, Ala 44, Asp 45, Asn 20, Leu 43, Ala 44, Met 263                                        |
|                                         | Rutin                             | 11                            | -2.5<br>-2.5                   | 2.71<br>2.66                 | -250.63                                   | -5.01          | Val 30, Gly 96, Ala 97, Arg 98, Ser 136, Asn 137, Pro 138, His 192, Ala 237, Gly 245, Tyr 246, Thr 247 |
|                                         | Potassium Magnesium Citrate (STD) | 3                             | -2.5                           | 2.91                         | -109.89                                   | -2.19          | Leu 266, Arg 267, Pro 74, Tyr 171, Glu 175, Val 179, Pro 181                                           |

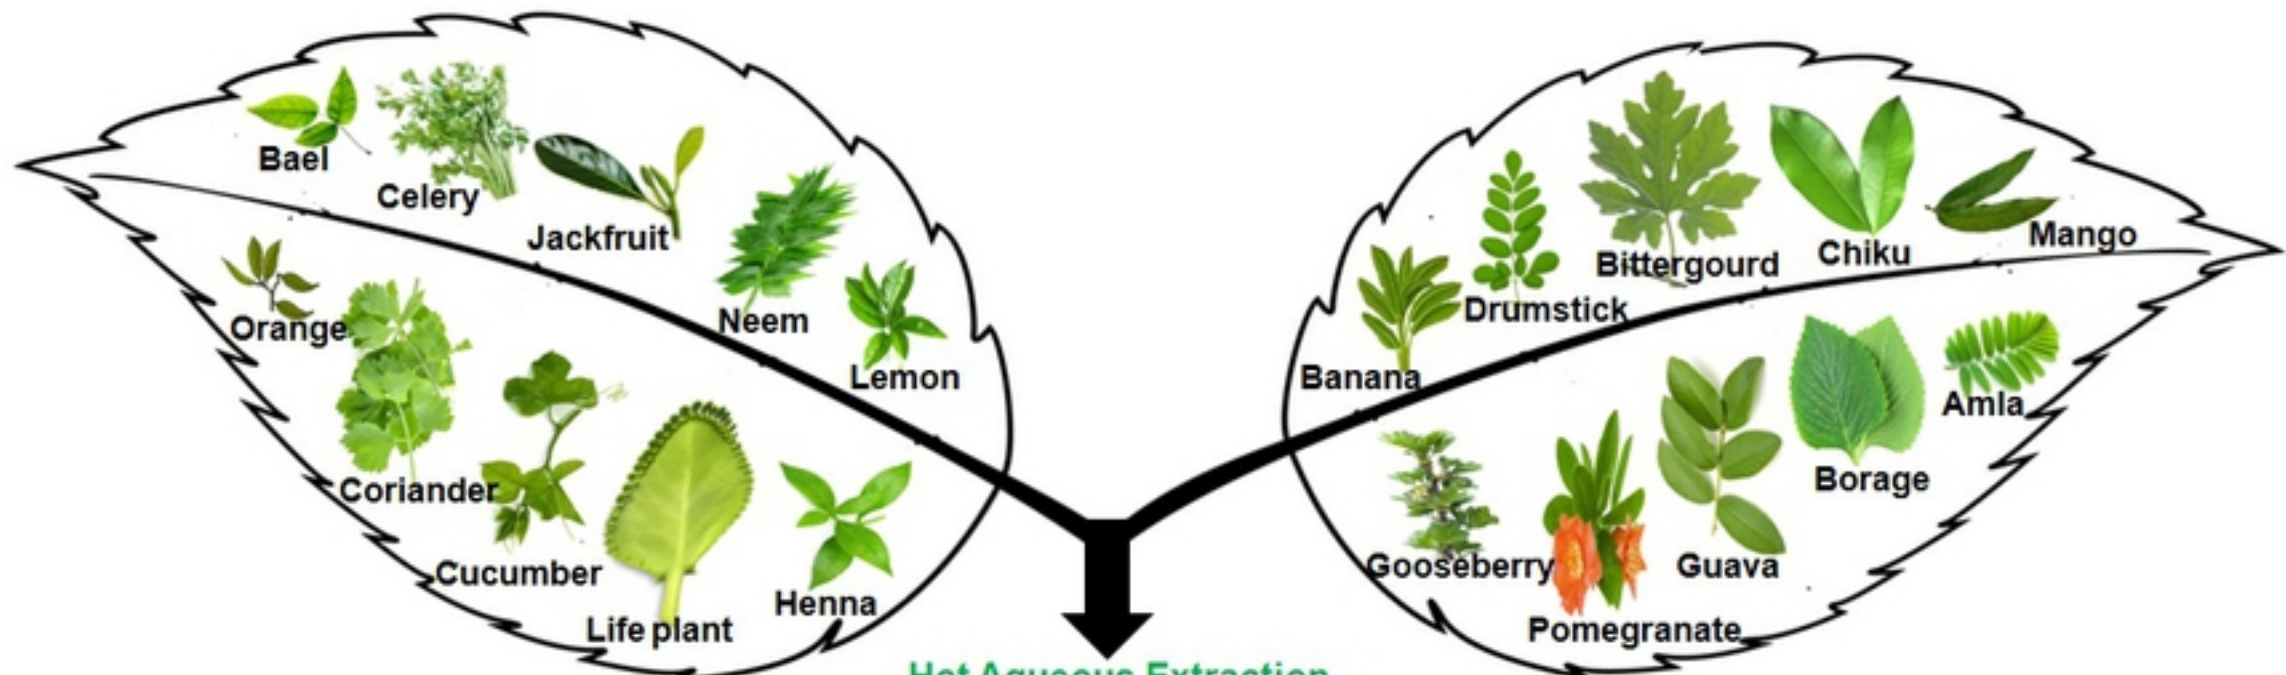

Hot Aqueous Extraction

Anti-Oxidant Activity

Anti-Urolithiatic Activity

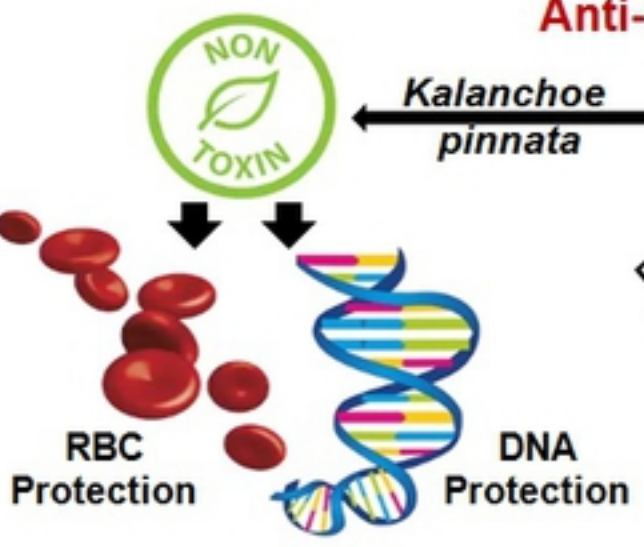

*Kalanchoe pinnata*

Phenolics  
 Reducing Power  
 Metal Chelating  
 DPPH

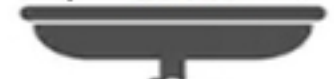

Molecular Docking  
 Rutin

CaOx  
 Dissolution  
 Aggregation Nucleation  
 Egg Membrane Assay

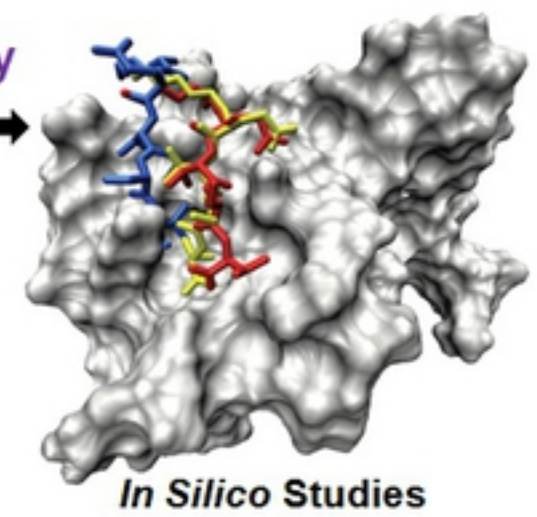

Graphical Abstract

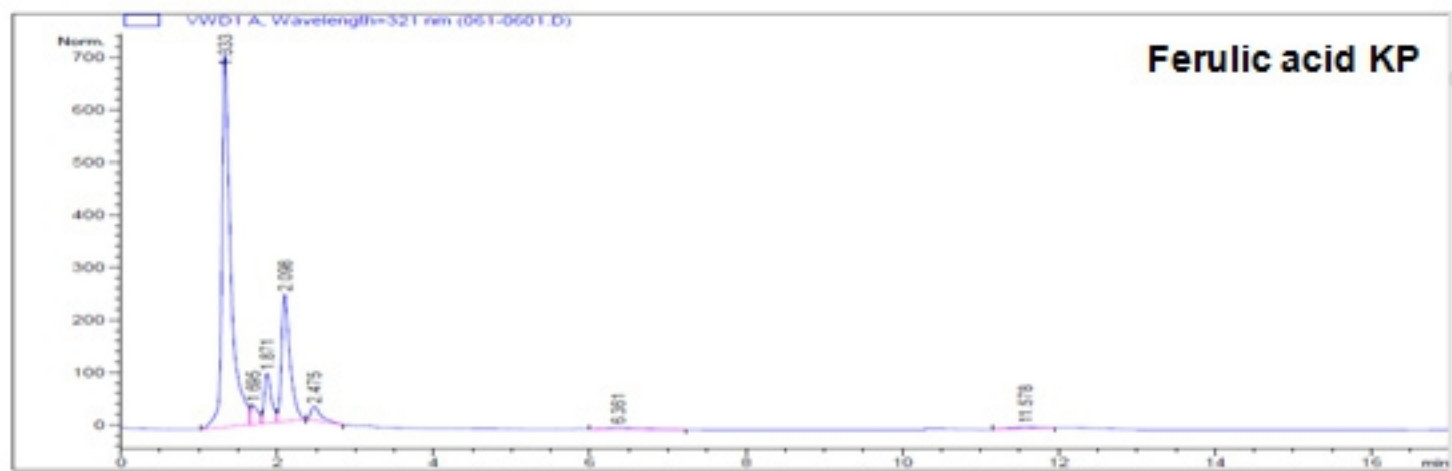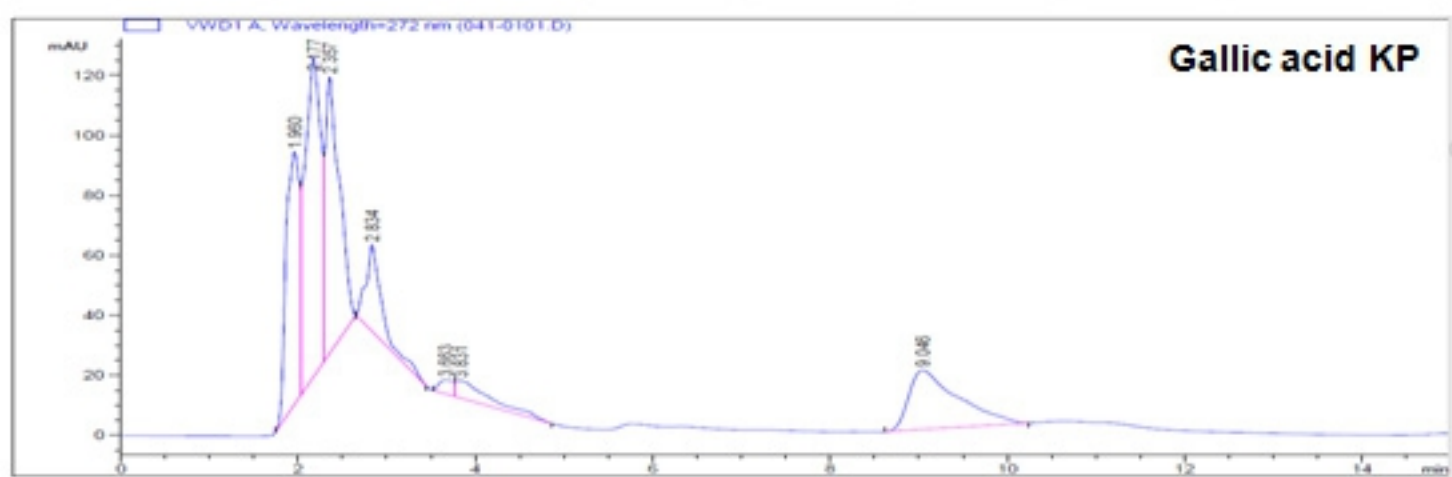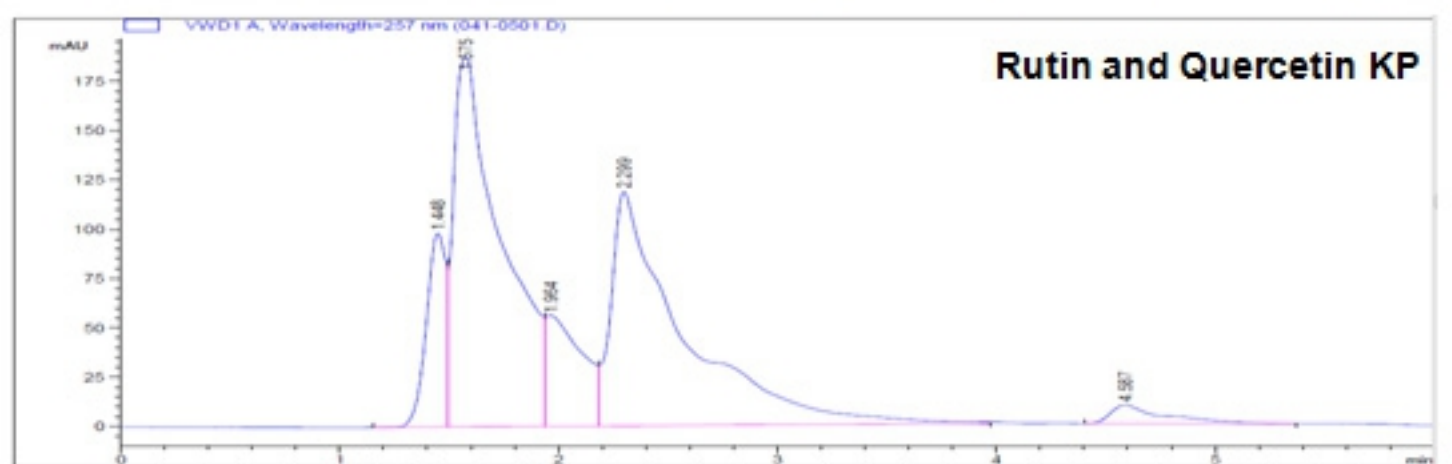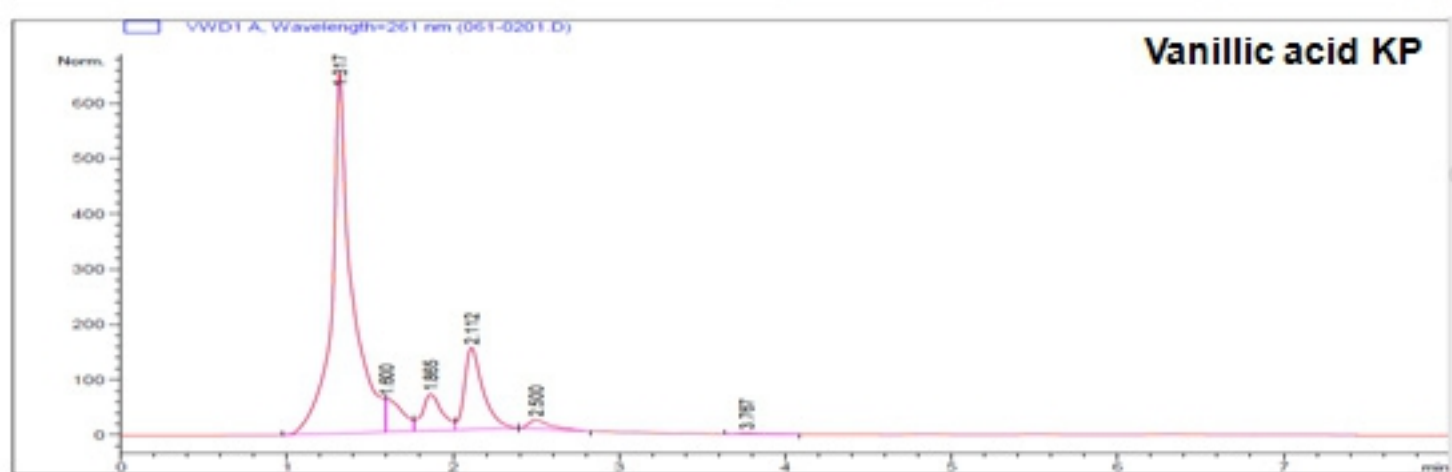

Figure 6





## Figure Legends:

**Figure 1:** Quantitative estimation of polyphenolic content of 20 selected botanicals.

**Figure 2:** Antioxidant radical scavenging assay of the 20 selected botanicals at 5 µg/mL, 15 µg/mL and 25 µg/mL respectively. (A): DPPH assay, (B): Metal ion chelating assay and (C): Reducing power assay.

bioRxiv preprint doi: <https://doi.org/10.1101/2021.06.01.446538>; this version posted June 1, 2021. The copyright holder for this preprint (which was not certified by peer review) is the author/funder, who has granted bioRxiv a license to display the preprint in perpetuity. It is made available under aCC-BY 4.0 International license.

**Figure 3:** Anti-lithiatic activity of 20 botanicals

**Figure 4:** In vitro experimental assessment of anti-lithiatic activity of top 5 best phyto-contributors using chicken egg membrane model with cystone as standard herbal drug.

**Figure 5:** (A): Dose-dependent assessment of KP extract using nucleation assay. (B): Dose-dependent assessment of KP extract using aggregation assay.

**Figure 6:** Panel A: Evaluation of KP extracts on erythrocyte morphology by RBC protection assay. (a): control-RBC, (b): RBC+PBS (pH 7.4), (c): RBC plus oxidant, (d): RBC plus gallic acid (std 10 µg/mL), (e): RBC plus 25 µg/mL of KP and oxidant after 1h of incubation. Panel B: Electrophoretic analysis of DNA protection assay by KP extracts. Lane 1: native DNA, Lane 2: oxidised DNA, Lane 3: Gallic acid (std 10 µg/mL), Lane 4: Cystone (std 10 µg/mL), Lane 5: KP extract (5 µg/mL) and Lane 6: KP extract (25 µg/mL).

**Figure 7:** HPLC profiling of the aqueous KP extract containing the phytochemicals.

**Figure 8:** *In silico* molecular docking of KP phytochemical ligands on antioxidant enzymes.

**Footnotes for Figure 8:** Docked images of antioxidant enzymes: (a) Superoxide dismutase docked with Gallic acid, (b) Superoxide dismutase docked with Vanillic acid, (c) Superoxide dismutase docked with Rutin, (d) Superoxide dismutase docked with Potassium-Magnesium Citrate, (e) Peroxidase docked with Gallic acid, (f) Peroxidase docked with Vanillic acid, (g) Peroxidase docked with Rutin, (h) Peroxidase docked with Potassium-Magnesium Citrate, (i) Catalase docked with Gallic acid, (j) Catalase docked with Vanillic acid, (k) Catalase docked with Rutin, (l) Catalase docked with Potassium-Magnesium Citrate, (m) Glutathione S-transferase docked with Gallic acid, (n) Glutathione S-transferase docked with Vanillic acid, (o) Glutathione S-transferase docked with Rutin and, (p) Glutathione S-transferase docked with Potassium-Magnesium Citrate.

**Figure 9:** *In silico* molecular docking of KP phytochemical ligands on calcium oxalate regulating metabolic enzymes.

**Footnotes for Figure 9:** Docked images of metabolic enzymes: (a) Alanine glyoxylate aminotransferase docked with Gallic acid, (b) Alanine glyoxylate aminotransferase docked with Vanillic acid, (c) Alanine glyoxylate aminotransferase docked with Rutin, (d) Alanine glyoxylate aminotransferase docked with Potassium-Magnesium Citrate, (e) Oxalyl CoA decarboxylase docked with Gallic acid, (f) Oxalyl CoA decarboxylase docked with Vanillic acid, (g) Oxalyl CoA decarboxylase docked with Rutin, (h) Oxalyl CoA decarboxylase docked with Potassium-Magnesium Citrate, (i) D- glycerate dehydrogenase docked with Gallic acid, (j) D- glycerate dehydrogenase docked with Vanillic acid, (k) D- glycerate dehydrogenase docked with Rutin, (l) D- glycerate dehydrogenase docked with Potassium-Magnesium Citrate, (m) Lactate dehydrogenase docked with Gallic acid, (n) Lactate dehydrogenase docked with Vanillic acid, (o) Lactate dehydrogenase docked with Rutin and, (p) Lactate dehydrogenase docked with Potassium-Magnesium Citrate.



## **Table Legends:**

**Table 1:** List of selected 20 botanicals screened for anti-oxidant and anti-urolithiatic activity.

**Table 2:** Structure-activity relationship (SAR) of potent ligands from KP with antioxidant enzymes.

**Table 3:** Structure-activity relationship (SAR) of potent ligands from KP with calcium regulating metabolic enzymes.
